**Title:** Lifespan can be extended during a specific time window early in life

**Authors:** G. Aiello<sup>1</sup>, C. Sabino<sup>1</sup>, D. Pernici<sup>1</sup>, M. Audano<sup>2</sup>, F. Antonica<sup>1</sup>, M. Ganesello<sup>1</sup>, A. Quattrone<sup>3</sup>, N. Mitro<sup>2</sup>, A. Romanel<sup>4</sup>, A. Soldano<sup>3</sup> and L. Tiberi<sup>1\*</sup>.

5

**Affiliations:** <sup>1</sup>Armenise-Harvard Laboratory of Brain Cancer, Department CIBIO, University of Trento, Trento, Italy.

<sup>2</sup>DiSFeB, Dipartimento di Scienze Farmacologiche e Biomolecolari, Università degli Studi di Milano, Milan, Italy.

10

<sup>3</sup> Laboratory of Translational Genomics, Department CIBIO, University of Trento, Trento, Italy.

<sup>4</sup> Laboratory of Bioinformatics and Computational Genomics, Department CIBIO, University of Trento, Trento, Italy.

\* Correspondence to: [luca.tiberi@unitn.it](mailto:luca.tiberi@unitn.it)

15

**One Sentence Summary:** Early life events increase lifespan.

**Abstract:** Lifespan is determined by complex and tangled mechanisms that are largely unknown. The early postnatal stage has been proposed to play a role in lifespan, but its contribution is still controversial. Here, we found that a short rapamycin treatment during early life can prolong lifespan in *Mus musculus* and *Drosophila melanogaster*. Notably, the same treatment at later time points has no evident effect on lifespan, suggesting that we found a crucial time-window involved in lifespan modulation. We discovered that sulfotransferases are upregulated during early rapamycin treatment both in newborn mice and *Drosophila* larvae. Furthermore, overexpression of the sulfotransferase *dST1* triggers an increment in the lifespan of *Drosophila melanogaster*. Our findings unveil a novel link between early-life treatments and long-term effects on lifespan.

20

25

**Main Text:** Genetic and environmental conditions in early organism development could influence traits later in life, including diseases, ageing and lifespan (1–3). Indeed, few studies have reported that different diets for pregnant mothers or for young mice affect offspring survival (3,4). Notably, there is also controversial evidence about the correlation between early-life treatments and lifespan extension in mammals (3,5). Similar experiments conducted in

30

*Drosophila melanogaster* and *Caenorhabditis elegans* showed that dietary or changes in cellular ROS levels during development can induce lifespan extension (6–8). Interestingly, lifespan can be also modulated through the regulation of the mTOR pathway. This signaling is evolutionarily conserved from yeast to mammals and regulates growth and metabolism in response to growth factors, amino acids, stresses, as well as changes in cellular energy status (9). Inhibition of the mTOR signaling pathway by genetic or pharmacological intervention extends lifespan in vertebrates, yeast, nematodes, and fruit flies (10–12). Treating mice with rapamycin, an inhibitor of the mTOR pathway, from 20 months of age extends the median and maximal lifespan of both male and female mice (13) and the same effect has been observed in *Drosophila melanogaster* (14). Nevertheless, most of the published data on dietary interventions and drug treatments have been performed during the adult life of several organisms (10), while early-life rapamycin administration has never been tested in wild type mice (15). Indeed, transient rapamycin administration was only used in elder mice (16,17) and the mechanisms behind this lifespan increase are elusive. Here, we investigated whether an early-life and transient rapamycin administration can prolong lifespan in two animal models, *Mus musculus* and *Drosophila melanogaster*.

**Results:** We tested whether mice lifespan was sensitive to early-life modulation by performing an early transient rapamycin treatment on CD1 outbred mice. Rapamycin (10mg/kg) was administrated daily in two distinct temporal windows, from postnatal day 4 to postnatal day 30 (P4-P30), or from postnatal day 30 to postnatal day 60 (P30-P60) (**Fig. 1A**) and the lifespan was evaluated using a Kaplan-Meier survival curve (log-rank test). Combined data from both sexes showed a 9.6% increase in median lifespan in P4-P30 rapamycin-treated mice compared to control mice (treated with ethanol) and 9.1% increase compared to P30-P60 rapamycin-treated mice (**Fig. 1B, E**). The analysis of each gender separately showed similar result, leading to an 8.9% and 5.2% lifespan increment in P4-P30 rapamycin-treated males, and 8.4% and 4.4% increment in P4-P30 treated females compared to control and P30-P60 rapamycin-treated mice, respectively (**Fig. 1C-E**). Surprisingly, P30-P60 mice did not show any significant lifespan alteration compared to control mice. This indicates that modulation of mTOR activity could influence lifespan in a specific time window, suggesting that long-term effects on lifespan can be determined early in life. P4-P30 rapamycin treatment had a profound effect on mice anatomy leading to a severe reduction in body/organ size combined with weight decrease, when compared

to control mice (**Fig. 2A and fig. S1A**). Nevertheless, after P30 (the end of the treatment) the  
65 treated mice undergo a rapid body weight gain, even if they did not reach the control levels (**Fig.**  
**2B and fig. S1B**). A significant but milder decrease in body weight was also detected during the  
P30-P60 rapamycin treatment (**fig. S1C**) and it was maintained after the treatment (**fig. S1D**).

We confirmed the effectiveness of rapamycin treatment by evaluating the phosphorylation status  
70 of the ribosomal protein subunit S6 (pS6), a target substrate of S6 kinase 1 in the mTOR  
signaling pathway (13), in P4-P8 and P30-P34 mice livers (**Fig. 2C-D**). While mTOR inhibition  
is of a similar extent in the two time windows, it results in different physical and physiological  
long-term effects. P4-P30 rapamycin-treated mice remain smaller compared to their P30-P60  
counterpart throughout life, as shown by the analysis of total length at 15 and 20 months (**fig.**  
**S1E**). Aging can be considered as a biological process determined by the accumulation of  
75 deficits that over time culminates in death. The analysis of different non-invasive parameters  
allows assessing a Frailty Index (FI) that can be used as a strong predictor of mortality and  
morbidity (18–20). P4-P30 and P30-P60 rapamycin-treated mice were monitored during all life  
and FI was calculated at three different time points: young, 7-months-old (210-days-old),  
adults, 15-months-old (450-days-old) and aged, 20-months-old (611-days-old) (**Fig. 2E left side**).  
80 Although the two cohorts of mice showed no difference in the forelimb grip strength (**fig. S1F**),  
we observed a significant difference in the FI at 20 months between the P4-P30 and the P30-P60  
treated mice. In fact, P30-P60 mice showed a worst body condition score, frequent gait disorders  
together with the presence of a tumor in one out of seven analyzed animals that resulted in higher  
FI compared to the P4-P30 rapamycin-treated mice (**Fig. 2E right side and Table S1**).

85 Therefore, the lifespan extension of P4-P30 rapamycin-treated mice is associated with  
amelioration in several aging traits, resulting in a better health span compared to the P30-P60  
time window. To deeper investigate the differences between the two treatments, the physical and  
physiological assessment has been complemented with a transcriptomic analysis of the mice  
liver.  
90 To identify genes modulated by rapamycin, several groups have analyzed the hepatic gene  
signature in old mice subjected to continuous rapamycin treatment (21). Indeed, the liver  
controls several processes (i.e. hepatic glucose, insulin signaling and lipid homeostasis)  
potentially implicated in lifespan regulation in mammals (22,23). Here, to identify genes and  
pathways involved in the lifespan extension modulated by early-life rapamycin treatment only,

95 we analyzed by RNA-seq the gene expression profiles of P4-P30 and P30-P60 mice livers  
(sampled on the last day of treatment). Since it has been reported that rapamycin-mediated  
lifespan extension is subjected to sexual dimorphism (13,14), we performed differential  
expression analysis separately for males and females (compared against the respective control  
samples, see methods). The differential analysis highlighted that females have fewer  
100 differentially expressed genes (DEGs) compared to the males (**Fig. 3A and Table S2**).

To understand the long-term effects of early rapamycin treatments we analyzed the transcriptome  
landscape of P4-P30 and P30-60 mice at the middle life stage (P350). Interestingly, at P350 we  
observed an absence of significant transcriptome differences, with only a few mildly deregulated  
genes (**Fig. 3B-C and Table S3**). These results confirm the concept that the inhibition of mTOR  
105 leads to different effects depending on the time of the inhibition (24). In addition, we  
investigated whether the P4-P30 rapamycin associated signature correlates with the already  
published signature derived from chronic treatments. To do so, we compared P4-P30 RNA-seq  
data with the dataset obtained from two different chronic treatments starting at 4 months of life  
that differ for the administered dose of rapamycin (42 ppm and 14 ppm, respectively) and  
110 treatment duration (6 and 12 months, respectively) (21). The analysis showed that the early  
transient rapamycin treatment possesses a unique gene expression signature (**Fig. 3D**) leading us  
to focus on the gene expression changes on the last day of treatment.

To identify pathways associated with the altered gene signatures, we performed Gene Set  
Enrichment Analysis (GSEA) (**Fig. 4A and fig. S2A**). The analysis revealed that the two time  
115 windows of treatment lead to different and at times divergent gene set enrichments (**Fig. 4A**). For  
example, P4-P30 and P30-P60 treatments show opposite effects on chromatin binding and  
oxidoreductase activity (**Fig. 4A and fig. S2A and Table S4**). Overall, the analysis highlighted  
the broad upregulation of the sulfotransferase gene family by rapamycin treatment. In fact, we  
observed an enrichment of several molecular functions related to sulfotransferase activity  
120 (steroid-, bile salt-, and alcohol- sulfotransferase activity) in P4-P30 treated males that is not  
present in the P30-P60 time window (**Fig. 4A**). Interestingly, among the common deregulated  
genes in P4-P30 males and females, the sulfotransferases *Sult2a3* and *Sult2a6* emerged as two of  
the upregulated genes and *Sult5a1* as downregulated gene (**Fig 4B and Table S2**). Moreover,  
several sulfotransferases (SULTs), such as *Sult1d1*, *Sult1e1*, *Sult2a1*, *Sult2a2*, *Sult2a3*, *Sult2a4*,  
125 *Sult2a5*, *Sult2a6*, *Sult2a8* and *Sult5a1* are upregulated only in the P4-P30 time window (**Fig.**



4C). Sulfotransferases are a super gene family of enzymes involved in sulfonate conjugation processes, catalyzing the transfer of sulfonate ( $\text{SO}_3^-$ ) to a hydroxyl or amino group. Hepatic regulation and activity of SULTs could vary based on age and sex (25) and their expression is controlled by numerous members of the nuclear receptor (NR) superfamily, that act as sensors of xenobiotics as well as endogenous molecules, such as fatty acids, bile acids, and oxysterols (26).

To determine whether the functional enrichment in sulfotransferase activity can be linked to metabolic remodeling, we performed hepatic metabolomics analysis on P4-P30 and P30-P60 rapamycin-treated mice. A total of 138 metabolites were detected in the P4-P30 and P30-P60 time windows. We identified 70 metabolites that were significantly different across the two treatments (**Table S5**). The P4-P30 rapamycin treatment revealed a unique metabolic signature (**Fig. 5A-B**) and the deregulation of several primary and conjugated bile acids (**Table S5**). Of notice, bile acids biosynthesis was identified as one of the most enriched and significant pathways by the Metabolic Set Enrichment Analysis (MSEA) (**Fig. 5C**). Most of the detected primary and conjugated bile acids are downregulated in P4-P30 rapamycin-treated mice compared to the P30-P60 time window, suggesting the upregulation of the detoxifying pathway (**Fig. 5D**). This observation is consistent with previous findings where higher detoxification capacity was associated with reduced intrahepatic bile acid levels (27). The same analysis on P4-P30 and P30-P60 control mice did not show the same results, indicating only a few deregulated metabolites and a stronger overlap between the two time windows (**Fig. S3A-C and Table S5**). Interestingly, the metabolic differences revealed on the last day of treatment are not maintained later in life. Indeed, the same analysis on P4-P30 and P30-P60 at P350 did not reveal differences across the two treatments, showing overlap among the two time windows (**Fig. 5E-F, fig. S3D-E and Table S5**). Together, these results suggest that metabolic data correlate with the transcriptome analysis, leading to focus on the changes at the last day of treatment, that reflect the direct effect of lifespan-extending intervention, and indicating sulfotransferase activity as an important process affecting the early and transient rapamycin treatment at P4-P30.

To clarify the role of rapamycin in the modulation of sulfotransferases we decided to investigate the gene expression profiles of more acute treatments, such as P4-P8 and P30-P34. The inhibition of the mTOR pathway has a stronger transcriptome effect early in life (P4-P8), while only a few genes are deregulated in expression when the treatment occurs later (P30-P34) (**fig. S2B**). Interestingly, the nuclear hormone receptor *Nr1i3* (*CAR*) is upregulated in both male and

female P4-P8 (**fig. S2C and Table S2**). CAR regulates the expression of several sulfotransferases (26), and its upregulation upon rapamycin treatment might explain the enrichment of this category of genes in the P4-P30 treated mice. This data strongly supports the idea that rapamycin has different effects based on the age of administration and suggest that the sulfotransferase pathway may be involved in lifespan regulation.

The discovery that lifespan can be regulated in the early stage of life in mice prompted us to investigate whether this process was evolutionarily conserved. We recreated similar experimental conditions as in mice, by administering rapamycin during larval development of *Drosophila melanogaster*. *Drosophila* life cycle can be divided into 4 developmental stages: embryo, larva (three instar stages), pupa and adult that correspond to four distinct periods of life: embryonic development, a juvenile growth phase, sexual maturation, and reproductive adulthood, respectively (28). *Drosophila* growth occurs mainly during the juvenile larval stages, and the transition between the second (L2) and third larval instar (L3) represent an important time window during which the animal reaches the “critical weight” to continue the development (29). For this reason, rapamycin treatment was carried out in the isogenic *white iso31* (herein  $w^{iso31}$ ) *Drosophila* strain during the third instar larvae stage.  $w^{iso31}$  third instar larvae were treated with 1  $\mu$ M, 50  $\mu$ M or 200  $\mu$ M rapamycin, starting from 72 hours after egg-laying till pupal stage (**Fig. 6A upper timeline and fig. S4A upper timeline**). Although flies exposed to 1  $\mu$ M and 50  $\mu$ M do not show a significant increase in lifespan for both sexes (**Fig. S4 B-G and Table S6**), treatment with 200  $\mu$ M rapamycin led to an increase in lifespan compared to the control (**Fig. 6B**). As observed in mice, the treatment led to a reduction in body size that is maintained during all the developmental stages (**fig. S5A**). Early transient rapamycin treatment on *Drosophila* larvae determined a significant increase in median lifespan when both genders were analyzed together (**Table S6**), while, when the genders were analyzed separately only male flies showed a significant lifespan extension compared to control flies (**Fig. 6B-D**). To verify whether the modulation of mTOR activity influences *Drosophila melanogaster* lifespan only in a specific time window as for the mammalian counterpart (**Fig. 1A, B**), we tested the effect of rapamycin treatment at later timepoint. When 10-days-old  $w^{iso31}$  flies were treated with 200  $\mu$ M rapamycin for 3 days (**Fig. 6A lower timeline**) no effect was observed in terms of body size and lifespan compared to control (**Fig. 6E-G and fig. S5B**). The effectiveness of rapamycin treatment in the two time windows was evaluated by profiling the phosphorylation status of S6K by western blot

analysis, using a phospho-Thr398-dependent S6K antibody (14). Flies exposed to 200  $\mu$ M rapamycin at the last day of treatment (wondering larvae and 13-days-old, respectively) showed a comparable reduction in phospho-T398-S6K, suggesting that TOR signaling is similarly down-regulated in the two time windows (**fig. S5C**). These results strengthen the idea that lifespan can be determined by transient early-life events and that similar treatments at later time points have no effect on lifespan. Although the mechanism is evolutionarily conserved, *Drosophila* and mouse development is significantly different and difficult to compare. To investigate if TOR inhibition could influence *Drosophila* lifespan during other time windows, we treated *w<sup>iso31</sup>* flies with 200  $\mu$ M rapamycin during early stages of adult life, such as the first 10 days after eclosion (adult emergence from the pupal cases) (**Fig. 6A**). Interestingly, rapamycin-treated flies displayed an increase in lifespan compared to the control (**Fig. 6H**) leading to an increment in the median lifespan for both sexes (**Fig. 6I-J and Table S6**). Moreover, to verify that the effect was due to the specific time window of administration and not to the duration of the treatment, we also treated 10-days-old *w<sup>iso31</sup>* flies with 200  $\mu$ M rapamycin for 10 days (**Fig. 6A**) and we observed no effect on lifespan (**Fig. 6K-M and Table S6**). In conclusion, our results indicate that inhibition of TOR in specific time windows early in life is an evolutionary conserved mechanism that leads to lifespan extension.

As previously described, the RNA-seq experiment performed on mice liver (**Fig. 4A-B**), suggested that sulfotransferases could be involved in lifespan extension induced by the rapamycin treatment. *Drosophila* harbors four *SULTs* orthologues, namely *dST1*, *dST2*, *dST3* and *dST4*, thought to be derived from gene duplication processes occurred in a common ancestral gene. Among them, *dST1* and *dST3* show a high degree of homology (30,31) and as shown in **fig. S6A-B**, we observed increased *dST1* and *dST3* mRNA levels upon 12 hours of rapamycin treatment during larval development, but not in adult (10-days-old) treated flies, thus supporting the idea that rapamycin has different effects based on age of administration, as observed in mammals. Of notice, *dST1* (CG5428) shares 46% and 47% of similarity in the amino acidic sequence with the mouse *Sult2a3* and *Sult2a6* respectively counterparts that are upregulated in both male and female P4-P30 rapamycin treated mice (**Fig. 4B**). To investigate the role of *dST1* in lifespan extension, we took advantage of the GAL4-UAS system (32) to induce *dST1* constitutive overexpression during the entire life of flies, using a *TubGal4* promoter (**Fig. 7A upper timeline**). Lifespan was compared to a transgenic strain carrying the same genetic weight

(*UAS-GFP;tubGal4/+*). Constitutive *dSTI* upregulation in transgenic flies determines a decrease  
220 in lifespan compared to control flies of both sexes (**Fig. 7B-D**). Since prolonged upregulation  
seems to be detrimental, we aimed to recreate the same experimental conditions of rapamycin  
treatment by transiently overexpressing *dSTI* during larval development only (**Fig. 7A lower  
timeline**). Transient *dSTI* upregulation was achieved using a *tubGal80<sup>TS</sup>;TubGal4* strain, and the  
lifespan was compared to a transgenic strain carrying the same genetic weight (*tubGal80<sup>TS</sup>/UAS-  
225 GFP;tubGal4/+*). *dSTI* overexpressing flies displayed an extension of lifespan compared to  
control (**Fig. 7E and Table S6**) and the effect was present in both males and females (**Fig. 7F-G  
and Table S6**). These data support the previous rapamycin experiments on mice and *Drosophila*  
(**Fig. 1A and Fig. 6A**) and confirmed the presence of precise time windows during which  
lifespan can be affected. To characterize the effect of transient *dSTI* overexpression on the fitness  
230 of the flies, we tested their endurance by analyzing the motor function during aging with a  
negative geotaxis assay. Indeed, locomotor behavior is considered as a marker of organismal  
health that declines with age (8,14). Early and transient *dSTI* up-regulation in larvae improved  
the climbing performance over time compared to controls (**Fig. 7H**) and the amelioration was  
present in both sexes (**Fig. 7 I-J**). Overall, our novel findings demonstrate that lifespan can be  
235 determined during early life, unveiling the role of *dSTI* as a new lifespan modulator.

**Discussion:** Environmental and genetic components influence lifespan by regulating specific  
signaling pathways, metabolism, and transcription factors. So far, the great majority of studies  
were based on pharmacological treatments administered late in life for a prolonged time or  
repeated treatments. On the other hand, only a few groups studied how perturbation in the early  
240 life of mice and flies (i.e., caloric restriction/modulation or antioxidant treatments) affects  
lifespan (3,5,8). Our results indicate a critical early-life timeframe during which the modulation  
of age-related pathways determines a long-term effect on lifespan. By exploiting a transient  
rapamycin treatment, we identified a crucial lifespan-extending time window both in mouse (P4-  
P30) and in *Drosophila melanogaster* (larval stage and early adult).

245 Interestingly, the transient inhibition of the mTOR pathway in later periods of life does not  
significantly improve the lifespan. Our results suggest the existence of a ‘memory’ mechanism  
that increases lifespan, and that can be modulated in early life only. A similar hypothesis has  
been postulated in mice exposed to caloric restriction in adult life (33). These mice showed signs

of a ‘nutritional memory’ and metabolic remodeling of white adipose tissue, but the molecular mechanisms beyond these effects are unknown (33).

To identify genes that affect lifespan, we analyzed gene expression profiles of livers from mice transiently treated with rapamycin early in life (P4-P30). We chose to profile the liver, because this tissue regulates glucose, insulin signaling and lipid homeostasis and could potentially regulate mammalian lifespan (22,23). Furthermore, hepatic gene signatures of different lifespan-extending treatments have been already used to identify aging-related candidate genes (21). Indeed, P4-P30 rapamycin-treated mice processed on the last day of treatment show a unique and distinct hepatic gene signature, different from the other transient treatments. Of notice, this signature is not maintained during later time points. Indeed, gene expression changes cannot be observed in middle life (P350). These results led us to speculate that the P4-P30 modulation of the mTOR pathway determines a chain of events set in motion during the early-life time window, revealing new age-related genes with novel functions in regulation of lifespan. Importantly, GSEA analysis on P4-P30 treated mice (males) resulted in the enrichment of several molecular functions related to sulfotransferase activity (steroid-, bile salt-, and alcohol- sulfotransferase activity) while *Sult2a3* and *Sult2a6* were found upregulated in both sexes. *SULTs* are generally involved in the xeno- and endobiotics metabolism that is divided into three phases: (I) modification, (II) conjugation and (III) excretion. Those enzymes catalyzed the transfer of sulfonate ( $\text{SO}_3^-$ ) to a hydroxyl or amino-group, favoring the elimination from the body (34). Sulfonation occurs on numerous xeno- and endobiotics such as drugs, steroid hormones, bile acids, peptides and lipids and it has been generally considered as a detoxification pathway generating an end-product that is more amenable to eliminate (34). Xenobiotic metabolism has been already associated with lifespan extension in *Drosophila melanogaster*. Indeed, early low doses of oxidants determine a long-term mechanism that leads to lifespan extension (7). However, the constitutive upregulation of xenobiotic resistance mediators correlates with health span amelioration, but not with lifespan extension (35). For this reason, we decided to test the early transient lifespan-extension role of sulfotransferase taking advantage of *Drosophila melanogaster*, that has a considerably shorter lifespan than mice and it is characterized by the presence of genetic tools that allow temporal modulation of gene expression. Indeed, transient *dST1* overexpression (*Sult2a3* and *Sult2a6* *Drosophila* homologs) during larval development, determines a significant increase of lifespan revealing a new putative function of *dST1* as an

280 early regulator of the aging process. Our findings indicate a link between early-life events and  
long-term effects on lifespan indicating the existence of a critical time window that can  
permanently affect how long an individual can live. We found that the modulation of gene  
expression/pathways in this specific time window can determine lifespan extension both in mice  
and *Drosophila melanogaster*. Further studies are needed to assess the role of sulfotransferases  
285 and their regulators in the aging process and to unveil new drugs that might increase lifespan  
through an early and transient administration. However, our data represent a new starting point  
for the study of lifespan, paving the path for future work on humans.

### References and Notes:

- 290 1. Barker DJP, Osmond C. INFANT MORTALITY, CHILDHOOD NUTRITION, AND  
ISCHAEMIC HEART DISEASE IN ENGLAND AND WALES. *The Lancet*.  
1986;327(8489):1077–81.
2. Gluckman PD, Hanson MA, Cooper C, Thornburg KL. Effect of In Utero and Early-Life  
Conditions on Adult Health and Disease. *New England Journal of Medicine*. 2008;359(1):61–73.
- 295 3. Ozanne SE, Hales CN. Catch-up growth and obesity in male mice. *Nature*. 2004;427(6973):411–  
2.
4. Sun L, Akha AAS, Miller RA, Harper JM. Life-span extension in mice by preweaning food  
restriction and by methionine restriction in middle age. *Journals of Gerontology - Series A  
Biological Sciences and Medical Sciences*. 2009;64(7):711–22.
- 300 5. English S, Uller T. Does early-life diet affect longevity? A meta-analysis across experimental  
studies. *Biology Letters*. 2016;12(9).
6. Bazopoulou D, Knoefler D, Zheng Y, Ulrich K, Oleson BJ, Xie L, et al. Developmental ROS  
individualizes organismal stress resistance and lifespan. *Nature*. 2019;576(7786):301–5.
7. Obata F, Fons CO, Gould AP. Early-life exposure to low-dose oxidants can increase longevity via  
305 microbiome remodelling in *Drosophila*. *Nature Communications*. 2018;9(1).
8. Stefana MI, Driscoll PC, Obata F, Pengelly AR, Newell CL, MacRae JI, et al. Developmental  
diet regulates *Drosophila* lifespan via lipid autotoxins. *Nature Communications*. 2017;8(1).
9. Liu GY, Sabatini DM. mTOR at the nexus of nutrition, growth, ageing and disease. Vol. 21,  
*Nature Reviews Molecular Cell Biology*. 2020. p. 183–203.



- 310 10. Fontana L, Partridge L, Longo VD. Extending healthy life span-from yeast to humans. Vol. 328, Science. 2010. p. 321–6.
11. Kaeberlein M, Westman E, Dang N, Kerr E, III RP, Steffen K, et al. Regulation of Yeast Replicative Life Span by TOR and Sch9 in Response to Nutrients. Science. 2005;310(5751):1193–6.
- 315 12. Kapahi P, Zid BM, Harper T, Koslover D, Sapin V, Benzer S. Regulation of lifespan in Drosophila by modulation of genes in the TOR signaling pathway. Current Biology. 2004;14(10):885–90.
13. Harrison DE, Strong R, Sharp ZD, Nelson JF, Astle CM, Flurkey K, et al. Rapamycin fed late in life extends lifespan in genetically heterogeneous mice. Nature. 2009;460(7253):392–5.
- 320 14. Bjedov I, Toivonen JM, Kerr F, Slack C, Jacobson J, Foley A, et al. Mechanisms of Life Span Extension by Rapamycin in the Fruit Fly *Drosophila melanogaster*. Cell Metabolism. 2010;11(1):35–46.
15. Way SW, Rozas NS, Wu HC, Mckenna J, Reith RM, Hashmi SS, et al. The differential effects of prenatal and/or postnatal rapamycin on neurodevelopmental defects and cognition in a neuroglial mouse model of tuberous sclerosis complex. Human Molecular Genetics. 2012;21(14):3226–36.
- 325 16. Bitto A, Ito TK, Pineda V v, Letexier NJ, Huang HZ, Sutlief E, et al. Transient rapamycin treatment can increase lifespan and healthspan in middle-aged mice. eLife. 2016;5(AUGUST).
17. Strong R, Miller RA, Bogue M, Fernandez E, Javors MA, Libert S, et al. Rapamycin-mediated mouse lifespan extension: Late-life dosage regimes with sex-specific effects. Aging Cell. 330 2020;19(11).
18. Feridooni HA, Sun MH, Rockwood K, Howlett SE. Reliability of a Frailty Index Based on the Clinical Assessment of Health Deficits in Male C57BL/6J Mice. The journals of gerontology Series A, Biological sciences and medical sciences. 2015 Jun;70(6):686–93.
19. Schultz MB, Kane AE, Mitchell SJ, MacArthur MR, Warner E, Vogel DS, et al. Age and life 335 expectancy clocks based on machine learning analysis of mouse frailty. Nature Communications. 2020 Dec 15;11(1):4618.
20. Whitehead JC, Hildebrand BA, Sun M, Rockwood MR, Rose RA, Rockwood K, et al. A clinical frailty index in aging mice: comparisons with frailty index data in humans. The journals of gerontology Series A, Biological sciences and medical sciences. 2014 Jun;69(6):621–32.

- 340 21. Tyshkovskiy A, Bozaykut P, Borodinova AA, Gerashchenko M v, Ables GP, Garratt M, et al. Identification and Application of Gene Expression Signatures Associated with Lifespan Extension. *Cell metabolism*. 2019;30(3):573-593.e8.
22. Lamming DW, Sabatini DM. A central role for mTOR in lipid homeostasis. Vol. 18, *Cell Metabolism*. 2013. p. 465–9.
- 345 23. Sengupta S, Peterson TR, Laplante M, Oh S, Sabatini DM. MTORC1 controls fasting-induced ketogenesis and its modulation by ageing. *Nature*. 2010;468(7327):1100–6.
24. Baar EL, Carbajal KA, Ong IM, Lamming DW. Sex- and tissue-specific changes in mTOR signaling with age in C57BL/6J mice. *Aging cell*. 2016 Feb;15(1):155–66.
25. Kocarek TA, Duanmu Z, Fang H-L, Runge-Morris M. Age- and sex-dependent expression of  
350 multiple murine hepatic hydroxysteroid sulfotransferase (SULT2A) genes. *Biochemical Pharmacology*. 2008 Oct;76(8):1036–46.
26. Runge-Morris M, Kocarek TA, Falany CN. Regulation of the cytosolic sulfotransferases by nuclear receptors. *Drug Metabolism Reviews*. 2013 Feb 21;45(1):15–33.
27. Collino A, Termanini A, Nicoli P, Diaferia G, Polletti S, Recordati C, et al. Sustained activation  
355 of detoxification pathways promotes liver carcinogenesis in response to chronic bile acid-mediated damage. *PLOS Genetics*. 2018 May 7;14(5):e1007380.
28. Robertson CW. The metamorphosis of *Drosophila melanogaster*, including an accurately timed account of the principal morphological changes. *Journal of Morphology*. 1936 Jun;59(2):351–99.
29. Tennessen JM, Thummel CS. Coordinating Growth and Maturation — Insights from *Drosophila*.  
360 *Current Biology*. 2011 Sep;21(18):R750–7.
30. Fahmy K, Baumgartner S. Expression analysis of a family of developmentally-regulated cytosolic sulfotransferases (SULTs) in *Drosophila*. *Hereditas*. 2013 Jun;150(2–3):44–8.
31. HATTORI K, MOTOHASHI N, KOBAYASHI I, TOHYA T, OIKAWA M, TAMURA H. Cloning, Expression, and Characterization of Cytosolic Sulfotransferase Isozymes from  
365 *Drosophila melanogaster*. *Bioscience, Biotechnology, and Biochemistry*. 2008 Feb 23;72(2):540–7.
32. Brand AH, Perrimon N. Targeted gene expression as a means of altering cell fates and generating dominant phenotypes. *Development*. 1993;118(2):401–15.

33. Hahn O, Drews LF, Nguyen A, Tatsuta T, Gkioni L, Hendrich O, et al. A nutritional memory  
370 effect counteracts the benefits of dietary restriction in old mice. *Nature Metabolism*.  
2019;1(11):1059–73.
34. Gamage N, Barnett A, Hempel N, Duggleby RG, Windmill KF, Martin JL, et al. Human  
Sulfotransferases and Their Role in Chemical Metabolism. *Toxicological Sciences*. 2006 Mar  
1;90(1):5–22.
- 375 35. Afschar S, Toivonen JM, Hoffmann JM, Tain LS, Wieser D, Finlayson AJ, et al. Nuclear  
hormone receptor DHR96 mediates the resistance to xenobiotics but not the increased lifespan of  
insulin-mutant *Drosophila*. *Proceedings of the National Academy of Sciences*. 2016 Feb  
2;113(5):1321–6.

380

#### **Acknowledgments:**

We thank all members of the Tiberi laboratory for technical expertise and feedback. We thank  
Ilaria Morassut, Dr. Alessandro Alaimo and Dr. Annalisa Rossi for helpful discussion and  
advices. We thank Sergio Robbiati (MOF facility) and Veronica De Sanctis, Roberto Bertorelli,  
385 and Paola Fassan (NGS facility). We thank Dr. Alex Gould for providing us with the *white iso31*  
*Drosophila melanogaster* isogenic strain. We thank the Zurich ORFeome Project for the  
*Drosophila* stocks.

#### **Funding:**

390 G.A. was supported by a FIRC-AIRC fellowship for Italy. F.A. was supported by Fondazione  
Umberto Veronesi post-doctoral fellowship (il Dono di Rossana) and Marie Skłodowska Curie  
fellowship (grant agreement 844677). This work was funded by a grant from the Giovanni  
Armenise-Harvard Foundation, United States (Career Development Award 2016, to L.T.) and My  
First AIRC Grant, Italy (Project Code: 19921 to L.T. and 20621 to A.R), EMBO grant to L.T.

395

#### **Author contributions:**

G.A. and L.T. designed the study, analyzed data, and wrote the manuscript; A.S. supervised the  
*Drosophila melanogaster* experiments; F.A., A.S. and A.Q. helped for manuscript revision; G.A.  
performed all the experiments with help from C.S., M.G., and A.S.; G.A. and C.S. performed *in*

400 *vivo* experiments; Bioinformatics analyses were performed by D.P and A.R.; Metabolomic data  
and analyses were performed by M.A. and N.M.

**Competing interests:** The authors declare no competing interests.

### **Supplementary Materials:**

405 Materials and Methods  
Figures S1-S6  
Tables S1-S7  
Supplementary references

### **Materials and Methods**

#### **Mice**

410 CD1 mice (cat. #022) were purchased from Charles River and housed in a certified specific  
pathogen-free (SPF) Animal Facility in accordance with European Guidelines. Mice were  
provided ad libitum food access throughout their lifetime. Male and female CD1 mice were  
415 treated with rapamycin or ethanol at different time points and used for the survival analyses.  
Mice were monitored daily until human endpoint, caused by death or euthanasia due to the  
occurrence of severe age-related pathologies, identified by veterinary and biological services  
staff members. Survival analysis was performed using mice born within the same period (3-4  
months) and all of them derived from a small cohort of male and female CD1 mice, thus  
420 decreasing the differences in the genetic background. The experiments were approved by the  
Italian Ministry of Health as conforming to the relevant regulatory standards.

#### **Rapamycin treatment and survival analysis in mice**

425 Rapamycin (Alfa Aesar, cat. #J62473) was dissolved in ethanol at 20 mg/mL and then diluted in  
milli-Q water. CD1 mice were daily intraperitoneally injected with rapamycin (10 mg/kg) or  
ethanol for two distinct time windows from P4 to P30 or from P30 to P60 and sacrificed at the  
end of treatments for RNA-seq analysis or monitored until human endpoint for the survival  
analysis. Acute rapamycin effect was evaluated intraperitoneally injecting CD1 mice with either  
430 rapamycin (10 mg/kg) or ethanol from P4 to P8 or from P30 to P34 and sacrificed at the end of  
treatments for Western Blot and RNA-seq analysis. Control and rapamycin treated animals were  
defined per cage to ensure similar mother feeding among the rapamycin treated mice. Control  
and rapamycin treated mice were weaned at the same age.

#### **Weight analysis**

435 Rapamycin treated and control CD1 mice were weighed daily in the morning to check weight  
changes during and after rapamycin treatment. Weight measurements were collected from all the  
different time-windows: P4-P30 control (n=3), P4-P30 rapamycin (n=2), P30-P60 control (n=3),  
P30-P60 rapamycin (n=3). Mean weight measurements of each litter was calculated considering  
440 both males and females.

## Length analysis

Measurements have been performed on P4-P30 and P30-P60 rapamycin treated mice at 15 months and 20 months. Mean length measurements was calculated considering both males and females.

445

## Western Blot

Mouse section: Whole livers of mice subjected to four days of treatment (P4-P8 and P30-P34) were dissected and snap frozen from males and females CD1 mice at P8, and P34 respectively. Fresh-frozen livers were smashed with mortar and pestle and proteins were extracted from smashed tissues in lysis buffer (50mM Tris-HCl, 150mM NaCl, 20mM EDTA, 1% NP-40, 0,5% sodium deoxycholate, 0,1% SDS), supplemented with proteases inhibitors (VWR, cat. #M221-1ML), DTT (Thermo Fisher Scientific, cat. #R0861), and Serva Electrophoresis™ Phosphatase-Inhibitor-Mix II Solution (Thermo Fisher Scientific, cat. #3905501). *Drosophila* section: L3 wondering larvae (n=30) and 10-days-old flies (n=10) treated for three days with rapamycin or ethanol, were collected and homogenized using a pellet pestle (Sigma-Aldrich, cat. #Z359971-1EA) to obtain a better homogenization of the larvae and adult flies whole bodies in the same lysis buffer used for mouse whole liver extracts (see above). Samples in lysis buffer were left in ice for 30 min and then centrifuged at 18000 g for 20 min. Supernatants, containing extracted proteins, were collected in new eppendorf tubes and proteins were quantified using the Bradford method and stored at -80 °C. Proteins were resolved by SDS-PAGE and transferred onto a PVDF membrane (pore size 0,2 µm, Merck, cat. #GE10600021. The membrane was blocked in 5% BSA (Thermo Fisher Scientific, cat. #11423164)/TBS-T (0,1% Tween in TBS) for 1 h at room temperature and low agitation, and subsequently probed with primary antibodies, diluted in 5% BSA/TBS-T, overnight at 4 °C. Then, the membrane was washed with TBS-T three times for 10 min and incubated with secondary antibodies, diluted in 5% BSA/TBS-T, for 1 h at room temperature. After another cycle of three washes with TBS-T, protein levels were detected using the Clarity Western ECL Substrate (Biorad, cat. #1705062). The harsh stripping protocol was applied to detect the phosphorylation state of protein in the same PVDF membrane. To remove primary and secondary antibodies, the membrane was incubated with a stripping buffer (20 mL 10% SDS, 12,5 mL 0,5M Tris-HCl pH 6.8, 67,5 mL distilled water supplemented with 0,8 mL β-mercaptoethanol (Scharlab, cat. # ME00950250)) at 50 °C for 45 min. Then, the membrane was rinsed with milli-Q water for 1-2 min and with TBS-T for 5 min. After another step of blocking the membrane was incubated with a new primary antibody.

450

455

460

465

470

475

## RNA-extraction, library generation and sequencing

P4-P8 (n=3), P4-P30 (n=5), P30-P34 (n=3), P30-P60 (n=3) and P350 (n=3) control and rapamycin treated whole livers were dissected and snap frozen from males and females CD1 mice at P8, P30, P34, P60 and P350 respectively. Fresh-frozen livers were smashed with mortar and pestle and total RNA was isolated from smashed tissues with TRIzol Reagent (Invitrogen, cat. #15596018), according to the manufacturer's instructions. Pellet pestles (Sigma-Aldrich, cat. #Z359971-1EA) were used to obtain a better homogenization of the hepatic tissue in TRIzol. Then, RNA quality was controlled with the High Sensitivity RNA Assay at the 2100 Bioanalyzer (Agilent, cat. #G2939BA) and the extracted RNA was stored at -80 °C until the RNA-seq analysis. Libraries were prepared from the extracted RNAs using the QuantSeq 3'mRNA-Seq Library Prep Kit-FWD (Cat. No. LX01596 Lexogen, Vienna, Austria) using 1 µg of RNA per library and following the manufacturers' instructions. We modified the standard protocol by

480

485

490 adding Unique Molecular Identifiers (UMI) during the second strand synthesis step. Indices from the Lexogen i7 6nt Index Set and i5 6nt Dual Indexing Add-on Kits (Cat. No. 044.96 and 047.96, Lexogen) were used, and 15 cycles of library amplification were performed. Libraries were eluted in 30  $\mu$ L of the kit's Elution Buffer. The double-stranded DNA concentration was quantified using the Qubit dsDNA HS Assay Kit (ThermoFisher), ranging from 3 to 12 ng/ $\mu$ L. The molar concentration of cDNA molecules in the individual libraries was calculated from the double-stranded DNA concentration and the single library average size (determined on a PerkinElmer Labchip GX). An equal number of cDNA molecules from each library were pooled and the final pool was purified once more in order to remove any free primer and prevent index-hopping. The pooled libraries were sequenced in a Novaseq 6000 instrument (Illumina, San Diego, CA) on an SP flowcell, producing 900M single reads 100nt.

495 Sequencing reads from the resulting FASTQ files were aligned onto mouse reference genome (GRCm38 primary genome assembly) using STAR aligner version 2.7.7a (Dobin et al., 2013), setting the parameters `outFilterScoreMinOverLread` and `outFilterMatchNminOverLread` to the value 0.33. Resulting SAM files were sorted and converted to BAM files using SAM Tools (Li et al., 2009). Transcripts counts were computed using the `featureCounts` function available from the Rsubread R package (Liao et al., 2019), utilizing mouse gene annotation (GRCm38) for reads summarization. 6 and 12 months adult chronic rapamycin treatment RNA-seq data counts were downloaded from Gene Expression Omnibus (GEO) under accession number GSE131754 (Tyshkovskiy et al., 2019). Transcripts with a raw count lower than 20 in all biological replicates across the considered conditions were excluded. TMM (Trimmed Mean of M values) normalization and CPM (Counts Per Million) conversion were performed to obtain normalized transcript levels.

510

### Differential Expression Analysis

The edgeR R package (Robinson et al., 2010) was used to perform differential expression analysis. Rapamycin treated samples were compared against the respective control samples. Transcripts with a log<sub>2</sub> fold-change higher/smaller than 1/-1, an FDR-corrected p-value <0.05 and a mean log<sub>2</sub> CPM >0 across the replicates of at least one of the two compared groups were considered as significant differentially expressed genes (DEGs). To account for potential effects due to biological replicates generated in different sequencing batches, differential expression analysis of P4-P30 male and female mice was performed considering the batch as a covariate in the analysis model.

520

### Gene Set Enrichment Analysis

Gene set enrichment analysis (GSEA) of Gene Ontology (GO) Biological Processes (BP), Molecular Functions (MF) and Cellular Components (CC) terms was performed with the `gseGO` function of the `clusterProfiler` R package (Yu et al., 2012) and p-values were FDR-corrected.

525

As described in Tyshkovskiy et al., 2019 the input for the `gseGO` function was obtained by pre-ranking the list of genes of the edgeR output based on the  $-\log_{10}(\text{adjusted p-value})$  corrected by the sign of regulation (1, -1 or 0 if the log<sub>2</sub>FC value is positive, negative or equal to 0, respectively), as:

$$530 \quad \boxed{-\log_{10}(\text{adj pvalue}) * \text{sign}(\log_{2}\text{FC})}$$

Significance scores of enriched functions were obtained from the output of the `gseGO` function based on  $-\log_{10}(\text{q-values})$  corrected by the sign of the normalized enrichment score (NES), as:

$$\boxed{\text{significance score} = -\log_{10}(\text{qvalues}) * \text{sign}(\text{NES})}$$



Significance scores barplots were inspected manually to choose for terms that are statistically significant in the P4-P30 Male or Female categories.

535

### Metabolomics on mouse livers

540 Metabolomic data were obtained by liquid chromatography coupled to tandem mass spectrometry. We used an API-3500 triple quadrupole mass spectrometer (AB Sciex, Framingham, MA, USA) coupled with an ExionLC™ AC System (AB Sciex). Cells were smashed in a tissue lyser for 2 min at maximum speed in 250µl of ice-cold methanol/water/acetonitrile 55:25:20 containing [U-<sup>13</sup>C<sub>6</sub>]-glucose 1ng/µl and [U-<sup>13</sup>C<sub>5</sub>]-glutamine 1ng/µl as internal standards. Lysates were spun at 15,000g for 15 min at 4°C and supernatants were then passed through a regenerated cellulose filter (4mm Ø, Sartorius). Samples were then  
545 dried under N<sub>2</sub> flow at 40°C and resuspended in 125µl of ice-cold methanol/water 70:30 for subsequent analyses.

Amino acids, their derivatives and biogenic amine quantification was performed through previous derivatization. Briefly, 25µl out of 125µl of samples were collected and dried separately under N<sub>2</sub> flow at 40°C. Dried samples were resuspended in 50µl of phenyl-isothiocyanate (PITC), EtOH, pyridine and water 5%:31.5%:31.5%:31.5% and then incubated for 20 min at RT, dried under N<sub>2</sub> flow at 40°C for 90 min and finally resuspended in 100µl of 5mM ammonium acetate in MeOH/H<sub>2</sub>O 50:50. Quantification of different amino acids was performed by using a C18 column (Biocrates, Innsbruck, Austria) maintained at 50°C. The mobile phases for positive ion mode analysis were phase A: 0.2% formic acid in water and phase B: 0.2% formic acid in acetonitrile. The gradient was T<sub>0</sub>: 100%A, T<sub>5.5</sub>: 5%A, T<sub>7</sub>: 100%A with a flow rate of  
550 500µl/min. All metabolites analyzed in the described protocols were previously validated by pure standards and internal standards were used to check instrument sensitivity.

Quantification of energy metabolites, cofactors and nucleotides was performed by using a cyano-phase LUNA column (50mm x 4.6mm, 5µm; Phenomenex) by a 5 min run in negative ion mode with two separated runs. *Protocol A*; mobile phase A was: water and phase B was: 2mM ammonium acetate in MeOH and the gradient was 10% A and 90% B for all the analysis with a flow rate of 500µl/min. *Protocol B*; mobile phase A was: water and phase B was: 2mM ammonium acetate in MeOH and the gradient was 50% A and 50% B for all the analysis with a flow rate of 500µl/min.  
560

Acylcarnitines, GSH, GSSG and SAME quantification was performed on the same samples by using a Varian Pursuit XRs Ultra 2.8 Diphenyl column (Agilent). Samples were analyzed by a 9 min run in positive ion mode. Mobile phases were A: 0.1% formic acid in H<sub>2</sub>O B: 0.1% formic acid in MeOH and the gradient was T<sub>0</sub>: 35%A, T<sub>2.0</sub>: 35%A, T<sub>5.0</sub>: 5%A, T<sub>5.5</sub>: 5%A, T<sub>5.51</sub>: 35%A, T<sub>9.0</sub>: 35%A with a flow rate of 300µl/min.  
565

Bile acids were analyzed on an API-4000 triple quadrupole mass spectrometer (AB Sciex) coupled with a HPLC system (Agilent) and CTC PAL HTS autosampler (PAL System). The LC mobile phases were (A) 10mM NH<sub>4</sub>Ac and 0.015% formic acid in water, (B) 10mM NH<sub>4</sub>Ac and 0.015% formic acid in Acetonitrile/Methanol/Water (65/30/5). The gradient was as follows: T<sub>0</sub>: 65% A (flow rate 400µl/min), T<sub>0.7</sub>: 60% A (flow rate 400µl/min), T<sub>3</sub> 55% A (flow rate 400µl/min), T<sub>3.2</sub>: 45% A (flow rate 400µl/min), T<sub>5.5</sub>: 35% A (flow rate 450µl/min), T<sub>6.5</sub>: 0% A (flow rate 500µl/min), T<sub>8.5</sub>: 0% A (flow rate 600µl/min), T<sub>8.6</sub>: 65% A (flow rate 700µl/min) and T<sub>11</sub>: 65% A (flow rate 400µl/min). The Hypersil GOLD column C18 (100mm x 3 mm, 3 µm)  
570  
575

was maintained at 50°C. The mass spectrometer was operated in negative ion mode and in selective ion monitoring SIM/SIM mode.

580 MultiQuant™ software (version 3.0.3, AB Sciex) was used for data analysis and peak review of chromatograms.

Raw areas were normalized by the median of all metabolite areas in the same sample. Specifically, we defined the relative metabolite abundance ( $m_a^N$ ) as:

$$m_a^N = \frac{Xn}{M_{a=1}^n}$$

585 where  $Xn$  represents the peak area of metabolite  $n$  for samples  $a, b, \dots, z$ , and  $M_{a=1}^n$  represents the median of peak areas of metabolite  $n$  for samples  $a, b, \dots, z$ . Obtained data were then transformed by log10-transformation and Pareto scaled to correct for heteroscedasticity, reduce the skewness of the data, and reduce mask effects (Ghaffari et al., 2019). In detail, obtained values were transformed by log10 and then scaled by Pareto's method as follows:

590 
$$\bar{x}_{ij} = \frac{x_{ij} - \bar{x}_i}{\sqrt{s_i}}$$

where  $x_{ij}$  is the transformed value in the data matrix ( $i$  (metabolites),  $j$  (samples)) and  $s_i$  is the standard deviation of transformed metabolite values (van den Berg et al., 2006). Obtained values were considered as relative metabolite levels. Data processing and analysis were performed by MetaboAnalyst 5.0 web tool (Chong et al., 2019).

595

### Frailty Index Assessment

Frailty Index assessment was performed at 7, 15 and 20 months on P4-P30 and P30-P60 rapamycin treated mice. The clinical FI score for each mouse was calculated using a modified version of the tool published previously by Whitehead et al. (Whitehead et al., 2014). Briefly, mice were placed in a fresh cage and moved to a dedicated small animal procedure room designed for behavioral testing. Mice were weighed and then a series of non-invasive observations on 30 clinical items were taken (as listed in Table S1). Clinical assessment included evaluation of the integument, musculoskeletal system, vestibulocochlear and auditory systems, ocular and nasal systems, digestive system, urogenital system, respiratory system, signs of discomfort, as well as the body weight (grams). A complete list of the clinical signs of deterioration and/or deficits evaluated in this study can be found in Table S1.

605

### Forelimb grip strength

A grip strength meter system (Cat. No. 47200, Ugo Basile Srl) was used to assess grip strength at 7, 15 and 20 months on P4-P30 and P30-P60 rapamycin treated mice. Mice were allowed to hold on to the grid with the front paws. Each mouse was given 3 trials over the course of 5 minutes. Average values (gF) were then normalized using the weight (g) to calculate the grip strength of an individual mouse.

610

615

### *Drosophila* stocks

*Drosophila* strains were raised on standard cornmeal and molasses medium in fly food vials (25 x 95 mm, Biosigma, cat. #789008) at 25°C where not otherwise indicated. Lyophilised Nutri-Fly Food (Genesee Scientific, cat. #789211), was used during the rapamycin treatment window. The stocks used in this study were: *white iso31* ( $w^{iso31}$  in the text, kind gift from Alex Gould),  $y[1] w[*]$ ;  $P\{w[+mC]=UAS-mCD8::GFP.L\}LL5$ ,  $P\{UAS-mCD8::GFP.L\}2$  (BDSC\_5137 - *UAS-GFP* in the text),  $P\{w[+mC]=tubP-GAL80[ts]\}10$ ;  $P\{w[+mC]=tubP-GAL4\}LL7/TM6B$ , *Tb[1]*

620

(BDSC\_86328 - *TubGal80;TubGal4* in the text), *y[1] w[\*]*; *P{w[+mC]=tubP-GAL4}LL7/TM3, Sb[1] Ser[1]* (BDSC\_5138 - *TubGal4* in the text) purchased from Bloomington Drosophila Stock Center and *M{UAS-St1.ORF.3xHA.GW}ZH-86Fb* (cat. #F003139, *UAS-dST1* in the text) purchased from FlyORF.

## Rapamycin treatment and survival analysis in *Drosophila*

### *Larval transient treatment*

Rapamycin (Alfa Aesar, cat. #J62473) was dissolved in ethanol at a final concentration of 20 mg/mL and then working aliquots were diluted in milli-Q water up to a concentration of 1  $\mu$ M, 50  $\mu$ M and 200  $\mu$ M. For each experiment of survival analysis, three independent cohorts of *w<sup>iso31</sup>* flies were established at 25 °C on Nutri-Fly food, to favor the distribution of rapamycin within the food. Adult flies were allowed to lay eggs in the test tubes for 12 hours leading to egg-synchronization. 72 hours after egg-laying, 1 ml of 1  $\mu$ M, 50  $\mu$ M or 200  $\mu$ M rapamycin solutions or ethanol as control was added drop by drop in each tube. Newly eclosed flies were promptly collected, divided by gender and maintained in new vials containing standard food at a density of  $10 \pm 3$  flies per vial. Flies were flipped to new vials at least twice a week and monitored for death events.

### *Adult early transient treatment*

Five cohorts of *w<sup>iso31</sup>* flies were established on standard food. Adult flies were allowed to lay eggs in the test tubes for 12 hours leading egg-synchronization. Newly eclosed flies were collected, divided by gender and maintained in new vials containing standard food at a density of  $10 \pm 3$  flies per vial. **From day 0 to 10:** On the first day post-eclosion, flies were transferred to new vials containing Nutri-Fly food supplemented with 1 ml of ethanol or 200  $\mu$ M of rapamycin. Flies were maintained in the Nutri-Fly food for 10 days (flipped three times) and then transferred back to fresh vials with standard food. **From day 10 to 13:** On the tenth day post-eclosion, flies were transferred to new vials containing Nutri-Fly food supplemented with 1 ml of ethanol or 200  $\mu$ M of rapamycin. Flies were maintained in the Nutri-Fly food for 3 days and then transferred back to fresh vials with standard food. **From day 10 to 20:** On the tenth day post-eclosion, flies were transferred to new vials containing Nutri-Fly food supplemented with 1 ml of ethanol or 200  $\mu$ M of rapamycin. Flies were maintained in the Nutri-Fly food for 10 days (flipped three times a week) and then transferred back to fresh vials with standard food. For all the timepoints listed above flies were flipped to new vials at least twice a week and monitored for death events.

### *Drosophila* 's food receipts

Flies were reared on standard sugar/yeast/agar food (Standard food) or Nutri-Fly food, based on the experimental setup. Standard food consists of 85 g corn flour, 60 g sugar, 30g Brewers Yeast (ACROS Organics™, cat. # 368080050), 10g Insectagar ZN5 (B.&V. S.R.L. The Agar Company), 50g Molasses, 15 ml/L 1M Propionic Acid (Genesee Scientific, cat. #789177), 15 ml/L 10 % w/v Tegosept in Et-OH 96 % (Genesee Scientific, cat. #789063) per liter. Lyophilised food consists of 200 g Nutri-Fly Food (Genesee Scientific, cat. #789211), 16,25 g Brewers Yeast (ACROS Organics™, cat. # 368080050) per liter.

## Transient overexpression of dST1

### *Larval transient overexpression*

670 To study the effect of transient dST1 overexpression on *Drosophila* lifespan, the following  
crosses were established on standard food: ;*TubulinGal80<sup>ts</sup>*; *TubulinGal4/TM6B* flies with ; ;*UAS-*  
*dST1* flies, and ;*TubulinGal80<sup>ts</sup>*; *TubulinGal4/TM6B* flies with ;*UAS-GFP/Cyo*; flies. Adult flies,  
675 maintained at 18°C, were allowed to lay eggs in the test tubes for 12 hours leading to egg-  
synchronization. 130 hours after egg-laying, vials containing developing larvae were shifted to  
29 °C, to induce the temperature-sensitive inhibition of the Gal80 and allow the overexpression  
of the genes of interest (dST1 or GFP) till puparium formation and then maintained at 18 °C till  
680 death. Adult flies of each cross were selected for the following genotypes:  
;*TubulinGal80<sup>ts</sup>/+*; *TubulinGal4/UAS-dST1* (in the text *TubGal80; TubGal4; UAS-dST1*) and  
;*TubulinGal80<sup>ts</sup>/UAS-GFP; TubulinGal4/+* (in the text *TubGal80; TubGal4; UAS-GFP*). Selected  
flies were divided by gender in new vials containing standard food, at a density of 10 ± 3 flies  
per vial. Flies were flipped at least twice a week and monitored for death events.

### 680 **Constitutive dST1 overexpression**

To study the effect of constitutive dST1 overexpression on *Drosophila* lifespan, the following  
crosses were established on standard food: ; ;*TubGal4/TM6B* flies with ; ;*UASdST1* flies,  
685 ; ;*TubGal4/TM6B* flies with ;*UAS-GFP/Cyo*; flies. Adults were allowed to lay eggs in the test  
tubes for 12 hours leading to egg-synchronization. Male and female flies were selected after  
eclosion based on the specific genotype for the cross ( ; ;*TubGal4; UAS-dST1*, ; ;*TubGal4; UAS-*  
*GFP*, and maintained at 25°C in new vials. Flies were flipped three times a week and monitored  
for death events.

### 690 **Antibodies**

Primary antibodies used are listed here: Rabbit anti-Phospho-S6 Ribosomal Protein (Ser235/236)  
(1:1000, Cell Signaling, cat. #2211), Rabbit S6 Ribosomal Protein (5G10) (1:4000, Cell  
Signaling, cat. #2217). anti-dS6K (generous gift from Aurelio Teleman 1:3,000), and anti-  
phospho-Thr398-S6K (Cell Signaling Technologies #9209, 1:1,000), The secondary antibody  
695 used is Peroxidase AffiniPure Goat Anti-Rabbit IgG (H + L) (1:5000, Jackson ImmunoResearch,  
cat. #111-035-003) and Rabbit anti-Guinea Pig IgG (H+L) Secondary Antibody (1:5000 thermo  
fisher cat.# HRP 61-4620).

### 700 **RNA Isolation and Real-Time PCR Analysis**

*Drosophila*: Three biological replicates of L3 wandering larvae (n=30) and 10-days-old flies  
(n=10) treated for 12 hours with rapamycin or ethanol were snap frozen and stored at -80 °C.  
Total RNA from frozen samples was isolated with TRIzol Reagent (Invitrogen), using pellet  
pestles (Sigma-Aldrich, cat. #Z359971-1EA). RNA was reverse transcribed using iScript cDNA  
705 synthesis kit (Biorad, cat. #1708891) according to the manufacturer's instructions and  
quantitative PCR was performed using Power SYBR Green PCR Master Mix (Applied  
Biosystems, cat. #4367659). The Ct values were normalized to the housekeeping gene *tubulin*.  
Primer sequences used for qRT-PCR are listed in Table S7.

### 710 **Climbing performance assay**

Adult flies were placed in a plastic cylinder. Cylinder was tapped quickly and it was recorded the  
number of flies over 5 centimeters after 15 seconds. This step was repeated three times.

### **Statistical analysis**

715 Survival analysis was performed calculating the lifespan in days for every mouse or *Drosophila*  
and data were displayed using the Kaplan-Meier curve. The statistical significance of the results  
was tested using the Log-rank (Mantel-Cox) test.

Data of weight and length analyses are presented as mean + SD of three litters. Two-tailed  
Student's t-test was used for calculating significance values between treated and control mice.

720 For qRT-PCR analysis, data are presented as mean + s.e.m. of three biologically independent  
samples and a two-tailed Student's t-test was used to calculate significance.

For forelimb grip strength and FI analyses, data are presented as mean + s.e.m. and a two-way  
anova was used to calculate significance.

## 725 **List of Tables**

**Table S1** Table S1. Summary table of Frailty index analysis at 7, 15 and 20 months for P4-P30  
and P30-P60 rapamycin treated mice, related to Figure 2.

730 **Table S2** Differentially expressed genes (DEGs) after rapamycin treatment across the different  
time-windows processed at the last day of treatment, related to Figures 3, 4 and figure S2.

**Table S3** Differentially expressed genes (DEGs) after rapamycin treatment across the different  
time-windows processed at P350, related to Figures 3.

735 **Table S4** Significant GO terms result of GSEA of rapamycin treated mice across the different  
time-windows processed at the last day of treatment, related to Figure 4 and Figure S2.

**Table S5** Metabolite profiling data of rapamycin treated mice across the different time-windows  
and timepoints. Related to Figure 5 and fig. S3

740 **Table S6** Summary table of *Drosophila melanogaster* experiments related to Figure 6,7 and  
figure S4

**Table S7** qRT-PCR primers related to figures S6.

## 745 **Supplementary references**

van den Berg, R.A., Hoefsloot, H.C., Westerhuis, J.A., Smilde, A.K., and van der Werf, M.J.  
(2006). Centering, scaling, and transformations: improving the biological information content of  
metabolomics data. *BMC Genomics* 7, 142.

750 Chong, J., Wishart, D.S., and Xia, J. (2019). Using MetaboAnalyst 4.0 for Comprehensive and  
Integrative Metabolomics Data Analysis. *Current Protocols in Bioinformatics* 68.

Dobin, A., Davis, C.A., Schlesinger, F., Drenkow, J., Zaleski, C., Jha, S., Batut, P., Chaisson, M.,  
and Gingeras, T.R. (2013). STAR: ultrafast universal RNA-seq aligner. *Bioinformatics (Oxford,  
England)* 29, 15–21.

755 Ghaffari, M.H., Jahanbekam, A., Sadri, H., Schuh, K., Dusel, G., Prehn, C., Adamski, J., Koch,  
C., and Sauerwein, H. (2019). Metabolomics meets machine learning: Longitudinal metabolite  
profiling in serum of normal versus overconditioned cows and pathway analysis. *Journal of  
Dairy Science* 102, 11561–11585.

760 Li, H., Handsaker, B., Wysoker, A., Fennell, T., Ruan, J., Homer, N., Marth, G., Abecasis, G.,  
Durbin, R., and 1000 Genome Project Data Processing Subgroup (2009). The Sequence  
Alignment/Map format and SAMtools. *Bioinformatics* (Oxford, England) *25*, 2078–2079.  
Liao, Y., Smyth, G.K., and Shi, W. (2019). The R package Rsubread is easier, faster, cheaper and  
better for alignment and quantification of RNA sequencing reads. *Nucleic Acids Research* *47*,  
e47.  
765 Robinson, M.D., McCarthy, D.J., and Smyth, G.K. (2010). edgeR: a Bioconductor package for  
differential expression analysis of digital gene expression data. *Bioinformatics* (Oxford,  
England) *26*, 139–140.  
Yu, G., Wang, L.-G., Han, Y., and He, Q.-Y. (2012). clusterProfiler: an R package for comparing  
biological themes among gene clusters. *Omics : A Journal of Integrative Biology* *16*, 284–287.

770

775

780

785

790

795

800



805 **Figure Legends**

**Figure 1 - P4-P30 rapamycin treatment increases mice lifespan**

- 810 (A) Schematic illustration of the experimental procedure and results. Control mice were intraperitoneally injected daily with Et-OH from postnatal day 4 to postnatal day 30 (P4-P30). Treated mice were intraperitoneally injected daily with rapamycin during two distinct temporal windows, P4-P30 or P30-P60. P4-P30 rapamycin treated mice show a lifespan increment compared to control and P30-P60 treated mice.
- (B) Survival curves of control mice, P4-P30 rapamycin treated mice and P30-P60 rapamycin treated mice including data from both genders (males + females).
- 815 (C, D) Survival curves of male (C) and female (D) control mice, P4-P30 rapamycin treated mice and P30-P60 rapamycin treated mice.
- (E) Log-rank test on survival analysis (summary table).

820 **Figure 2 -Physical and physiological status of P4-P30 and P30-P60 rapamycin treated mice**

- (A) Upper panels: Representative pictures showing rapamycin effects on mice body size during P4-P30 treatment. Images have been taken at P4, P14 and P30 (end of the treatment). Scale bar: 3 cm. Lower panels: Scatter dot plot indicating body weight of control and rapamycin treated mice during P4-P30 treatment. Data are indicated as mean + SD.
- 825 (B) Upper panels: Representative pictures showing rapamycin effects on mice body size after P4-P30 treatment. Images have been taken at P40, P100 and P150. Scale bar: 3 cm. Lower panels: Scatter dot plot indicating body weight of control and P4-P30 rapamycin treated mice after the treatment. Data are indicated as mean + SD.
- (C, D) Upper part, schematic illustration of the experimental procedure. Western blot analysis of S6 Ribosomal Protein and phospho-S6 Ribosomal Protein (Ser235/236) from whole-liver protein extracts of female and male at P8 (C) and P34 (D) treated mice. Mice were sampled after 4 days of Et-OH or rapamycin treatment.
- 830 (E) Schematic illustration of the different timepoints analyzed (left side) and frailty index box (right side) of P4-P30 and P30-P60 rapamycin treated mice. Red scatter dots indicate the frailty index of P4-P30 rapamycin mice at 7 months (n=20), 15 months (n=18) and 20 months (n=12). Blue scatter dots indicate the frailty index of P30-P60 rapamycin mice at 7 months (n=14), 15 months (n=9) and 20 months (n=7). Data are indicated as mean + SEM. \*p-value<0.05, \*\*p-value<0.005, \*\*\*p-value<0.0005, n.s.- not significant.
- 835

840

**Figure 3 - RNA-seq analysis on P4-P30 rapamycin treated mice resulted in a unique transcriptional signature.**

- (A) Schematic illustration of the experimental procedures (left). Landscape of up- and down-regulated genes across P4-P30 and P30-P60 treatments in male and female mice. Venn diagrams are used to highlight private and shared differentially expressed genes.
- 845 (B) Schematic illustration of the experimental procedures (left). Landscape of up- and down-regulated genes across P4-P30 treatment processed at the last day of treatment and at P350 in male and female mice. Venn diagrams are used to highlight private and shared differentially expressed genes.

850 (C) Volcano plots showing the transcriptional changes in P4-P30 rapamycin treated male (upper panel) and female (lower panel) treated mice processed at P350. The log<sub>2</sub>FC is represented on the x-axis. The y-axis shows the -log<sub>10</sub> of the corrected p-value. A p-value of 0.05 and log<sub>2</sub>FC of 1 and -1 are indicated by gray lines. Top 10 upregulated and top 10 downregulated genes (when available) are labeled with gene symbols.

855 (D) Log<sub>2</sub>FC of genes that are differentially expressed only in male (left side) and female (right side) in response to P4-P30 treatment at the last day of treatment are compared, through heatmaps, with corresponding log<sub>2</sub>FC profiles in: P30-P60 on the last day of treatment; P4-P30 and P30-P60 treatment analyzed at P350; published data on chronic rapamycin treatment in adult life (6 and 12 months) (ref.21).

860

**Figure 4 – Functional enrichment analysis indicates sulfotransferases activity as a pathway involved in lifespan regulation.**

865 (A) Gene set enrichment analysis (GSEA) results of P4-P30 and P30-P60 at the last day of treatment in male and female mice. Significance score, calculated as -log<sub>10</sub>(q-value) corrected by the sign of regulation, is plotted on the y axis. Plots are representative of the top 12 GO Molecular Function (MF) terms with higher/lower significance scores for the male P4-P30 rapamycin treated mice (top 6 with higher significance scores and top 6 with lower significance scores). The whole list of enriched GO terms is available in Table S4.

870 (B) Volcano plots showing the transcriptional changes in P4-P30 rapamycin treated male (left side) and female (right side) treated mice. Each circle represents a gene. Underlined and highlighted terms are common *SULTs* genes shared by males and females (orange for upregulated genes, blue for downregulated genes). The log<sub>2</sub>FC is represented on the x-axis. The y-axis shows the -log<sub>10</sub> of the corrected p-value. A p-value of 0.05 and log<sub>2</sub>FC of 1 and -1 are indicated by gray lines. Top 10 upregulated and top 10 downregulated genes are labeled with gene symbols.

875 (C) Expression profile of sulfotransferases deregulated only in the P4-P30 time window in male (left side) and female (right side) treated mice. Values for treated (dark borders) and control (light borders) samples across the different conditions are shown as median CPM with bars representing standard deviations across the biological replicates. \*p-value<0.05, \*\*p-value<0.005, \*\*\*p-value<0.0005.

880

**Figure 5 - Early transient treatment with rapamycin increases bile acid liver detoxification in mice.**

885

(A, B) Principal Component Analysis (PCA) (A) and heatmap (B) of liver metabolomic profile from P4-P30 (green samples) and P30-P60 (red samples) mice treated with rapamycin.

890 (C) Top 25 metabolic pathways enriched in P4-P30 compared to P30-P60 mice treated with rapamycin. Metabolic Set Enrichment Analysis (MSEA) was performed taking advantage of MetaboAnalyst 5.0 webtool interrogating KEGG database. The x-axis shows the -log<sub>10</sub> of pvalue.

895 (D) Volcano plots showing the metabolomic changes in P4-P30 compared to P30-P60 mice treated with rapamycin. Each circle represents one metabolite. The log<sub>2</sub> fold change is represented on the x-axis. The y-axis shows the -log<sub>10</sub> of the False Discovery Rate (FDR). A FDR of 0.1 is indicated by gray line. Grey, pink and light blue dots represent unchanged,

significantly downregulated and significantly upregulated metabolites, respectively. Red dots represent significantly downregulated bile acids in P4-P30 compared to P30-P60 mice treated with rapamycin.

900 (E, F) Principal Component Analysis (PCA) (E) and heatmap (F) of liver metabolomic profile from P4-P30 (green samples) and P30-P60 (red samples) mice transiently treated with rapamycin and analyzed at P350.

905 **Figure 6 - Early transient rapamycin treatment on *w<sup>iso31</sup>* *Drosophila melanogaster* induces a time-dependent effect on lifespan.**

(A) Schematic illustration of the experimental procedure and results. Flies were transiently treated during larval stages with rapamycin 200  $\mu$ M starting from 72 hours after egg-laying to puparium formation (red) or during adulthood, from day 0 to day 10 (orange), from day 10 to day 13 (blue) or from day 10 to day 20 (purple). Rapamycin administration during development and during the first 10 days of life, but not at later timepoints, leads to lifespan increment.

910 (B) Survival curves of *w<sup>iso31</sup>* flies transiently treated from 72 hours after egg-laying till puparium formation (males + females) with Et-OH (control) or rapamycin 200  $\mu$ M.

(C, D) Survival curves of male (C) and female (D) *w<sup>iso31</sup>* flies transiently treated from 72 hours after egg-laying till puparium formation with Et-OH (control) or rapamycin 200  $\mu$ M.

915 (E) Survival curves of *w<sup>iso31</sup>* flies transiently treated in adult stage, from day 10 to 13 (males + females), with Et-OH (control) or rapamycin 200  $\mu$ M.

(F, G) Survival curves of male (F) and female (G) *w<sup>iso31</sup>* flies transiently treated in adult stage, from day 10 to 13, with Et-OH (control) or rapamycin 200  $\mu$ M.

920 (H) Survival curves of *w<sup>iso31</sup>* flies transiently treated from day 0 to day 10 (males + females) with Et-OH (control) or rapamycin 200  $\mu$ M.

(I, J) Survival curves of male (I) and female (J) *w<sup>iso31</sup>* flies transiently treated from day 0 to day 10 with Et-OH (control) or rapamycin 200  $\mu$ M.

(K) Survival curves of *w<sup>iso31</sup>* flies transiently treated from day 10 to 20 (males + females), with Et-OH (control) or rapamycin 200  $\mu$ M.

925 (L, M) Survival curves of male (L) and female (M) *w<sup>iso31</sup>* flies transiently treated from day 10 to 20, with Et-OH (control) or rapamycin 200  $\mu$ M. \*p-value<0.05, \*\*p-value<0.005, \*\*\*p-value<0.0005, n.s.- not significant.

930 **Figure 7 – Transient dST1 overexpression during larval stage, determines an increase in *Drosophila melanogaster* lifespan.**

(A) Schematic illustration of the experimental procedure and results. Constitutive dST1 overexpression during the entire life (blue) of flies do not increase lifespan. Transient dST1 overexpression during larval stage (red), leads to lifespan increment.

935 (B) Survival curves of flies harboring constitutive dST1 upregulation (*TubGal4/UAS-dST1*) compared to control strain (*UAS-GFP;TubGal4/+*) males + females.

(C, D) Survival curves of flies harboring constitutive dST1 upregulation (*TubGal4/UAS-dST1*) in male (C) and female (D) compared to control strain (*UAS-GFP;TubGal4/+*).

940 (E) Survival curves of flies upon upregulation of dST1 during larval stages (*tubGal80<sup>TS</sup>/+;TubGal4/UAS-dST1*) compared to the control strain *tubGal80<sup>TS</sup>/UAS-GFP;TubGal4/+* (males + females).

(F, G) Survival curves of male (F) and female (G) flies upon upregulation of dST1 during larval stages in (*tubGal80<sup>TS</sup>/+;TubGal4/UAS-dST1*) compared to control strain *tubGal80<sup>TS</sup>/UAS-GFP;TubGal4/+*.

945 (H) Climbing performance index of *tubGal80<sup>TS</sup>/UAS-GFP;TubGal4/+* and *tubGal80<sup>TS</sup>/+;TubGal4/UAS-dST1* at different timepoints: 40 days (n=176, 196 respectively), 60 days (n=159, 178 respectively) and 80 days (n=119, 158 respectively). Upregulation of dST1 has been induced only during larval stages.

950 (I) Climbing performance index of male *tubGal80<sup>TS</sup>/UAS GFP;TubGal4/+* and *tubGal80<sup>TS</sup>/+;TubGal4/UAS-dST1* at different timepoints: 40 days (n=93, 93 respectively), 60 days (n=79, 81 respectively) and 80 days (n=41, 70 respectively). Upregulation of dST1 has been induced only during larval stages.

955 (J) Climbing performance index of male female *tubGal80<sup>TS</sup>/UAS-GFP;TubGal4/+* and *tubGal80<sup>TS</sup>/+;TubGal4/UAS-dST1* at different timepoints: 40 days (n=83, 103 respectively), 60 days (n=80, 97 respectively) and 80 days (n=78, 88 respectively). Upregulation of dST1 has been induced only during larval stages.

\*p-value<0.05, \*\*p-value<0.005, \*\*\*p-value<0.0005, n.s.- not significant).

960 **Figure S1. Analysis of physical status of P4-P30 and P30-P60 rapamycin treated mice at different timepoints.**

(A, B) Upper panels: Schematic illustration of the experimental procedures. Rapamycin effects on body and organs size in P4-P30 treated mice. Representative images of liver, brain, kidney and spleen have been taken at P30 (A) and P80 (B). Scale bar: 3 cm

965 (C) Upper panels: Representative images showing rapamycin effects on mice body size during P30-P60 treatment, taken at P30, P40 and P60 (end of treatment). Scale bar: 3 cm. Lower panels: Scatter dot plot indicating body weight of control and P30-P60 rapamycin treated mice during treatment. Data are indicated as mean + SD.

970 (D) Upper panels: Representative images showing rapamycin effects on mice body size after P30-P60 treatment, taken at P70, P90 and P150. Scale bar: 3 cm. Lower panels: Scatter dot plot indicating body weight of control and P30-P60 rapamycin treated mice after treatment. Data are indicated as mean + SD.

975 (E) Box plots indicating the total length (mm) of P4-P30 and P30-P60 rapamycin treated mice. Red scatter dots indicate the measurements of P4-P30 rapamycin mice at 15 months (n=18), and 20 months (n=12). Blue scatter dots indicate the measurements of P30-P60 rapamycin mice at 15 months (n=9) and 20 months (n=7). Data are indicated as mean + SEM.

980 (F) Box plots indicating the force (Newton/grams) resulted from grip strength analysis of P4-P30 and P30-P60 rapamycin treated mice. Red scatter dots indicate the measurements from P4-P30 rapamycin mice at 7 months (n=20), 15 months (n=18) and 20 months (n=12). Blue scatter dots indicate the measurements from P30-P60 rapamycin mice at 7 months (n=14), 15 months (n=9) and 20 months (n=7). Data are indicated as mean + SEM. \*p-value<0.05, \*\*p-value<0.005, \*\*\*p-value<0.0005, n.s.- not significant.

985 **Figure S2. RNA-seq analysis of acute rapamycin treatments (P4-P8 and P30-P34).**

(A) Gene set enrichment analysis (GSEA) results of P4-P30 and P30-P60 treatments in male and female mice. Significance score, calculated as  $\log_{10}(\text{q-value})$  corrected by the sign of regulation, is plotted on the y axis. The whole list of enriched GO terms is available in Table S4.

990 (B) Landscape of up- and down-regulated genes across the P4-P8 and P30-P34 treatments in male and female mice. Venn diagrams are used to highlight private and shared differentially expressed genes.

(C) Expression profile of *Nr1i3* (*CAR*) gene across P4-P8 and P30-P34 male (left side) and female (right side) treated mice. Values in treated and control samples across the different conditions are shown as median CPM with bars representing standard deviations across the biological replicates.

995 \*p-value<0.05, \*\*p-value<0.005, \*\*\*p-value<0.0005, n.s.- not significant.

### Figure S3 – Metabolic changes in early transient treated control mice.

1000 (A, B) Principal Component Analysis (PCA) (A) and heatmap (B) of liver metabolomic profile from P4-P30 (green samples) and P30-P60 (red samples) mice treated with vehicle.

(C) Volcano plots showing the metabolomic changes in P4-P30 compared to P30-P60 mice treated with vehicle. Each circle represents one metabolite. The  $\log_2$  fold change is represented on the x-axis. The y-axis shows the  $-\log_{10}$  of the FDR. A FDR of 0.1 is indicated by gray line. Grey, pink and light blue dots represent unchanged, significantly downregulated and significantly upregulated metabolites, respectively. Blue dots represent significantly upregulated bile acids in P4-P30 compared to P30-P60 mice treated with vehicle.

1005 (D, E) Principal Component Analysis (PCA) (D) and heatmap (E) of liver metabolomic profile from P4-P30 (green samples) and P30-P60 (red samples) mice transiently treated with vehicle and analyzed at P350.

### Figure S4. Early transient 1 $\mu\text{M}$ and 50 $\mu\text{M}$ rapamycin treatment does not induces a time-dependent effect on lifespan.

1015 (A) Schematic illustration of the experimental procedure and results. Flies were transiently treated during larval stages from 72 hours after egg-laying to puparium formation with 1  $\mu\text{M}$  (grey) or 50  $\mu\text{M}$  rapamycin (yellow).

(B) Survival curves of *w<sup>iso31</sup>* flies transiently treated from 72 hours after egg-laying till puparium formation (males + females) with Et-OH (control) or rapamycin 1  $\mu\text{M}$ .

1020 (C, D) Survival curves of male (C) and female (D) *w<sup>iso31</sup>* flies transiently treated from 72 hours after egg-laying till puparium formation with Et-OH (control) or rapamycin 1  $\mu\text{M}$ .

(E) Survival curves of *w<sup>iso31</sup>* flies transiently treated from 72 hours after egg-laying till puparium formation (males + females) with Et-OH (control) or rapamycin 50  $\mu\text{M}$ .

1025 (F, G) Survival curves of male (F) and female (G) *w<sup>iso31</sup>* flies transiently treated from 72 hours after egg-laying till puparium formation with Et-OH (control) or rapamycin 50  $\mu\text{M}$ . \*p-value<0.05, \*\*p-value<0.005, \*\*\*p-value<0.0005, n.s.- not significant.

### Figure S5. Physical status and biochemical effectiveness of rapamycin treatment in *w<sup>iso31</sup>* *Drosophila melanogaster*.

1030

(A) Representative images showing rapamycin effects on *Drosophila* body size during and after treatment on third instar (L3) larvae. Images acquired during L3 larvae (120 hours after egg-laying), pupae and adult (1 day post eclosion) stages. Scale bar: 3 mm

(B) Representative images showing rapamycin effects on *Drosophila* body size after treatment on 10-days-old flies. Images acquired during adult stage (3 days post treatment). Scale bar: 3 mm

(C) Western blot analysis of S6 Ribosomal Protein and phospho-T398-S6 Ribosomal Protein on whole-flies protein extracts of L3 Larvae (left side) and 10-days-old flies treated for 3 days (right side). \*p value<0.05.

**Figure S6. Sulfotransferases are putative rapamycin targets during larval stages but not in adult life.**

(A, B) Gene expression analysis via qRT-PCR of *dST1*(A) and *dST3*(B) in *w<sup>iso31</sup>* L3 larvae and 10-days-old adult flies treated with 200  $\mu$ M rapamycin, 12 hours after treatment. Data are indicated as mean + SEM. \*p-value<0.05, \*\*p-value<0.005, \*\*\*p-value<0.0005, n.s.- not significant.



A bioRxiv preprint doi: <https://doi.org/10.1101/2022.02.18.480980>; this version posted February 19, 2022. The copyright holder for this preprint (which was not certified by peer review) is the author/funder, who has granted bioRxiv a license to display the preprint in perpetuity. It is made available under aCC-BY-NC-ND 4.0 International license.

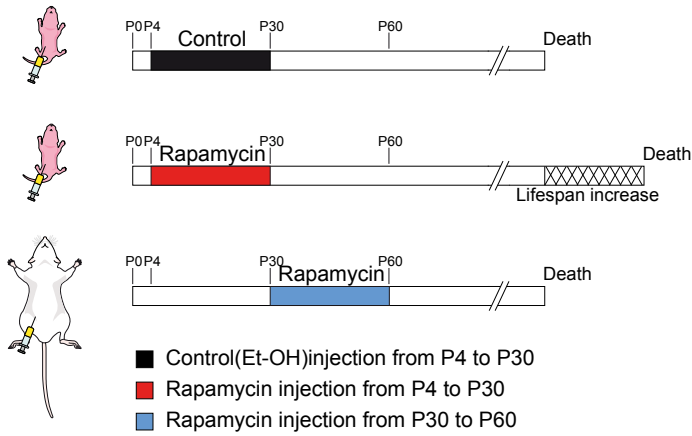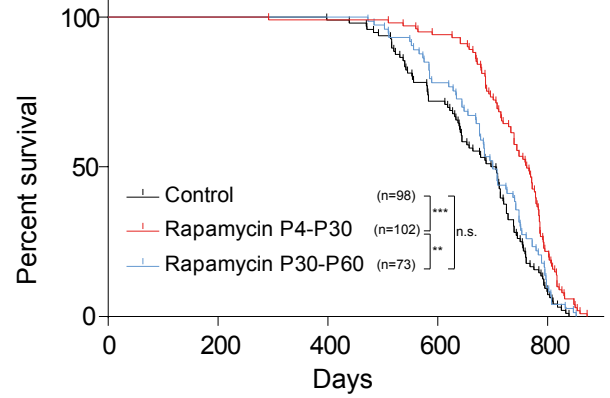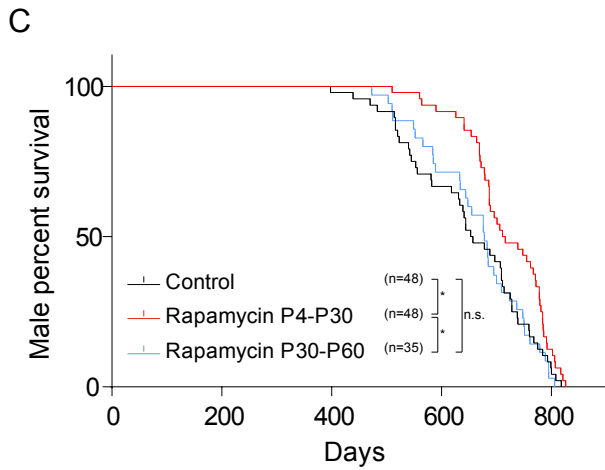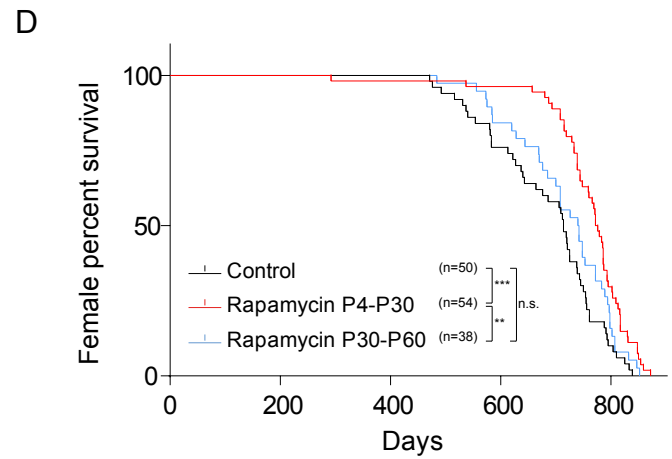

| Gender        | Treatment         | Number of animals | Median Survival (Days) | Percentage increase vs Ctrl | Percentage increase vs P30-P60 |
|---------------|-------------------|-------------------|------------------------|-----------------------------|--------------------------------|
| Male + Female | Control           | 98                | 697                    | /                           | n.s.                           |
|               | P4-P30 Rapamycin  | 102               | 764                    | 9,6                         | 9,1                            |
|               | P30-P60 Rapamycin | 73                | 700                    | n.s.                        | /                              |
| Male          | Control           | 48                | 655                    | /                           | n.s.                           |
|               | P4-P30 Rapamycin  | 48                | 713,5                  | 8,9                         | 5,2                            |
|               | P30-P60 Rapamycin | 35                | 678                    | n.s.                        | /                              |
| Female        | Control           | 50                | 714                    | /                           | n.s.                           |
|               | P4-P30 Rapamycin  | 54                | 774                    | 8,4                         | 4,4                            |
|               | P30-P60 Rapamycin | 38                | 741                    | n.s.                        | /                              |

Figure 1

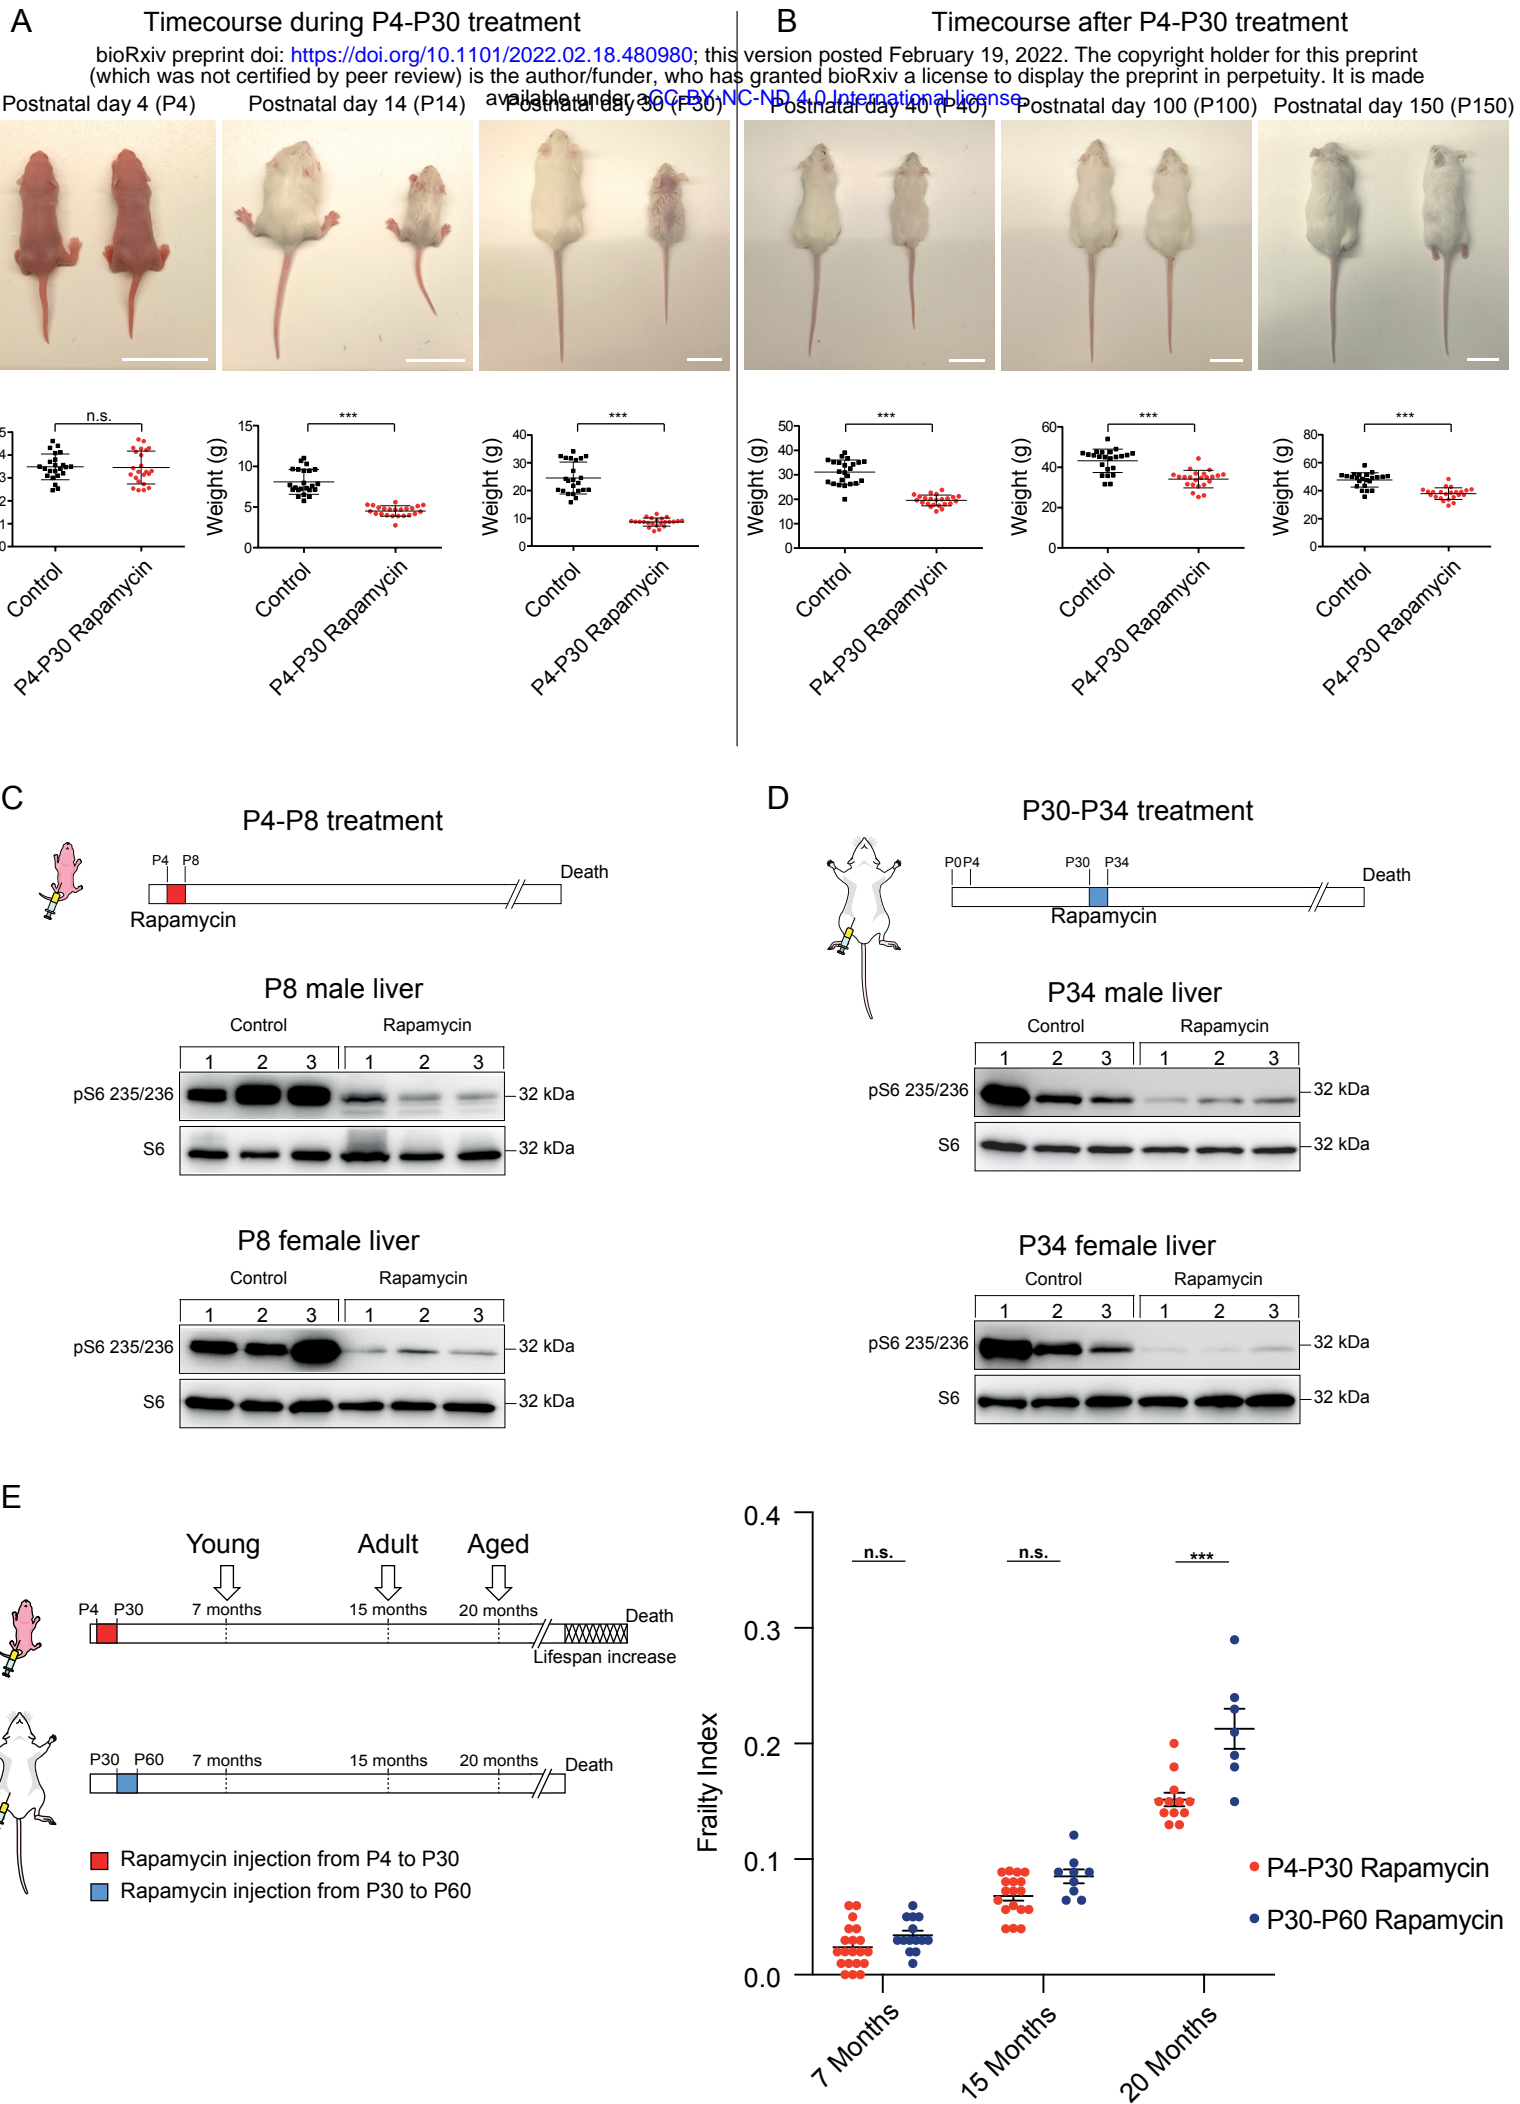

Figure 2

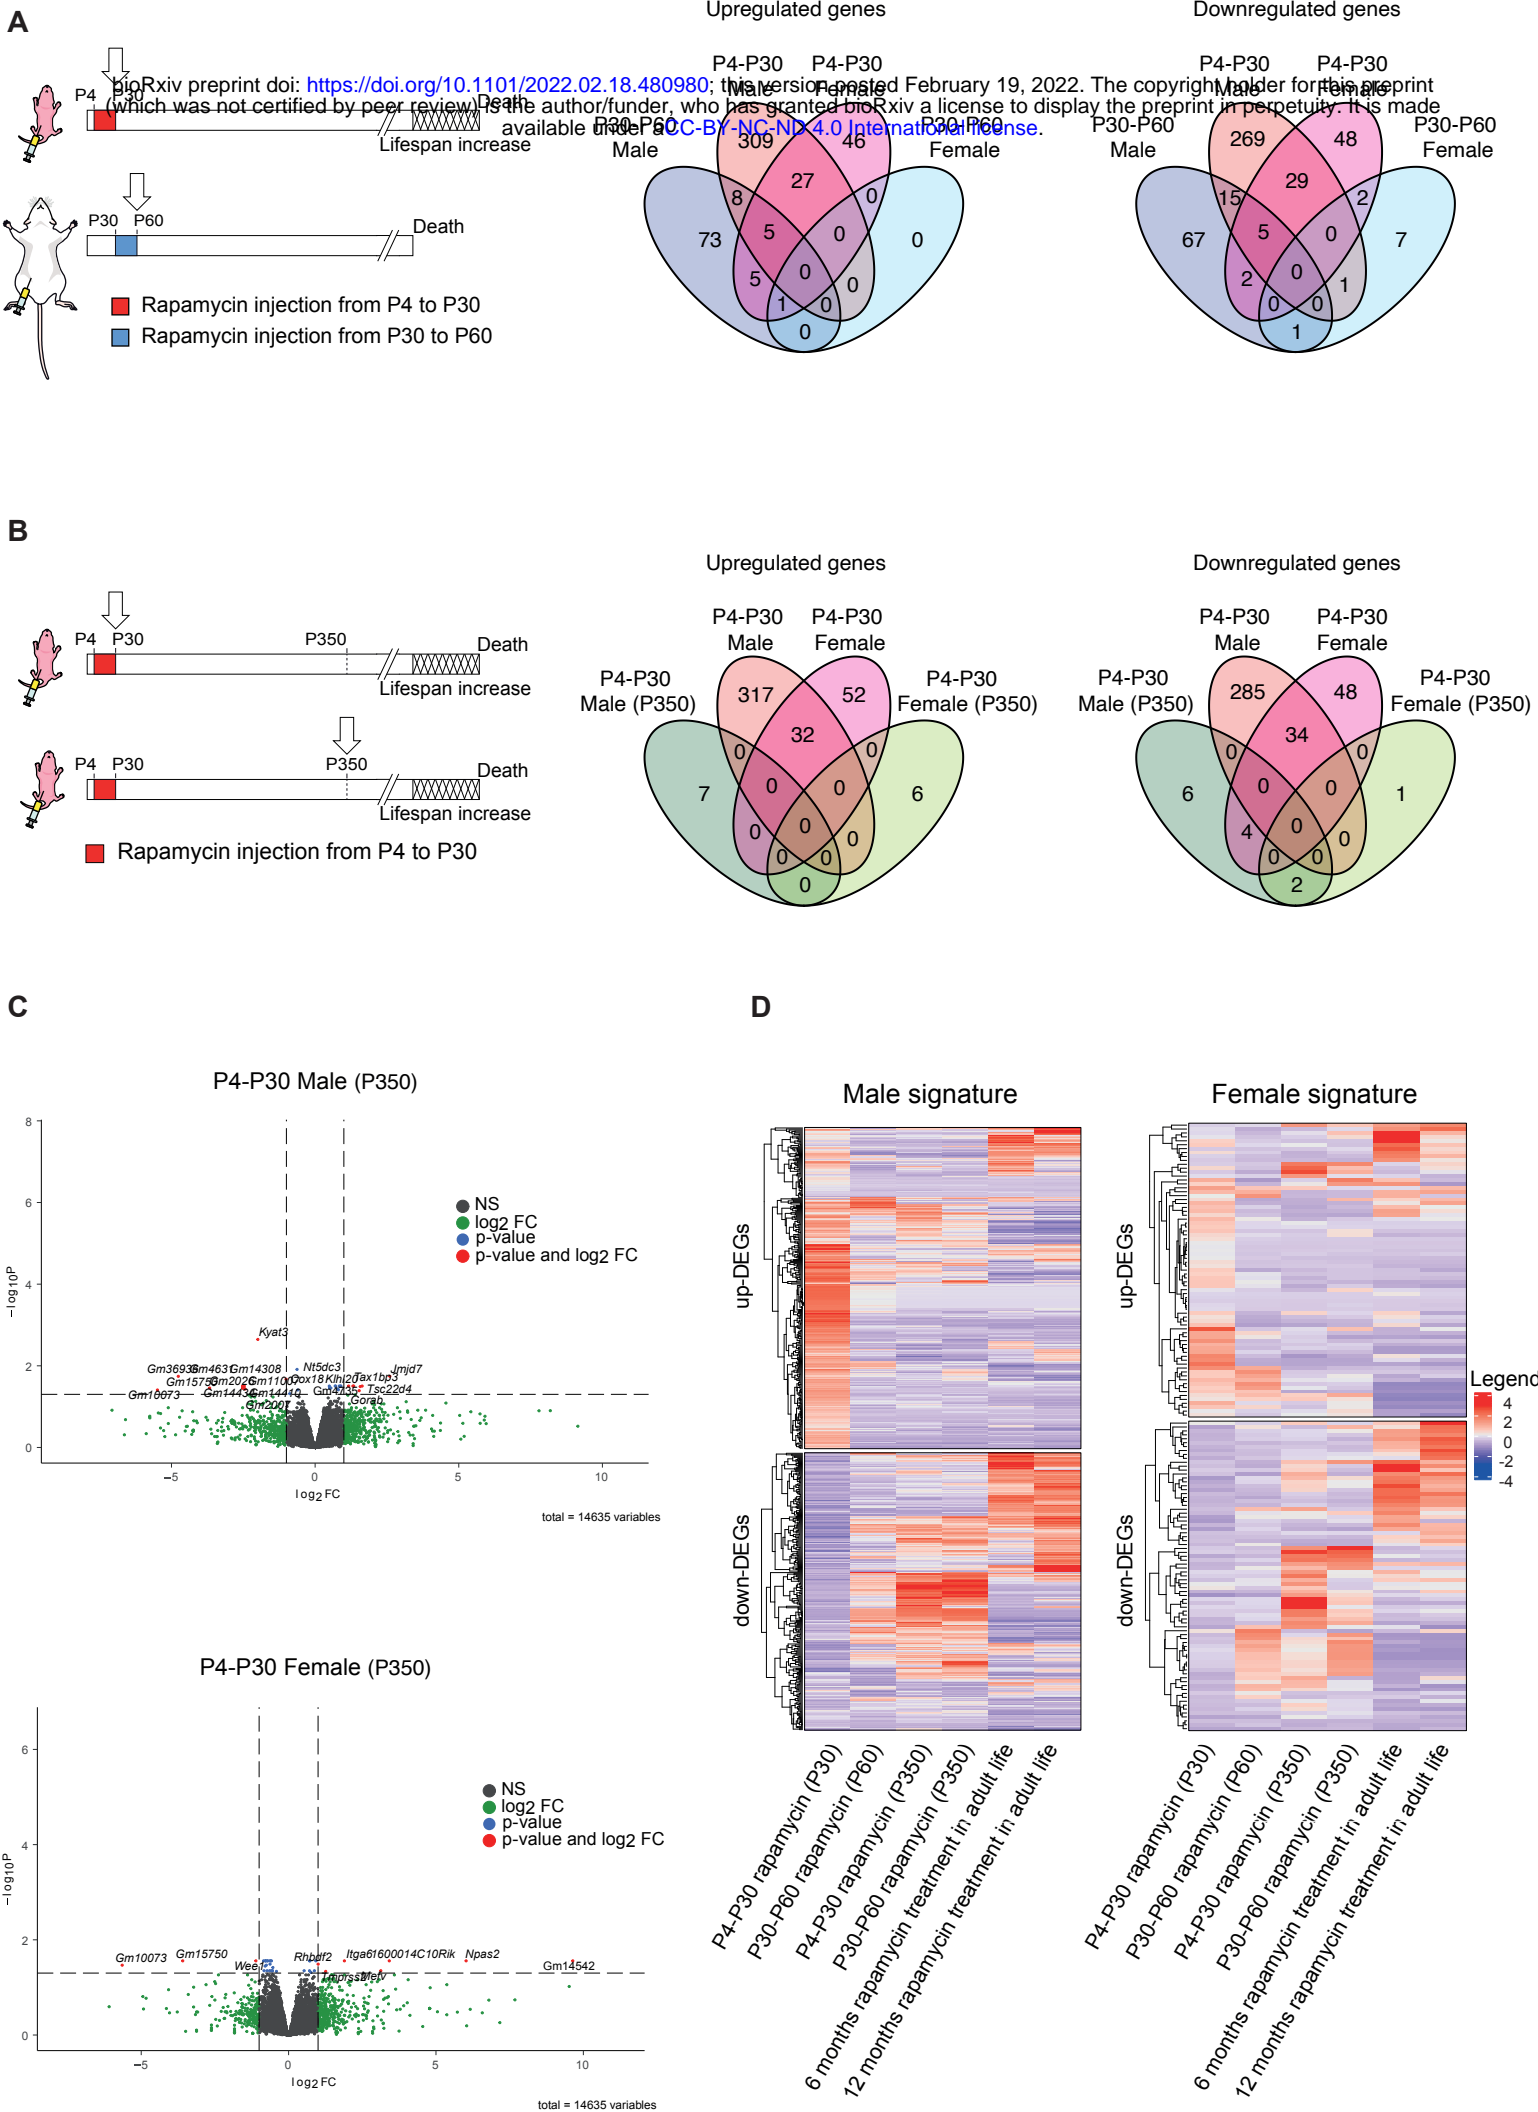

Figure 3

**A**

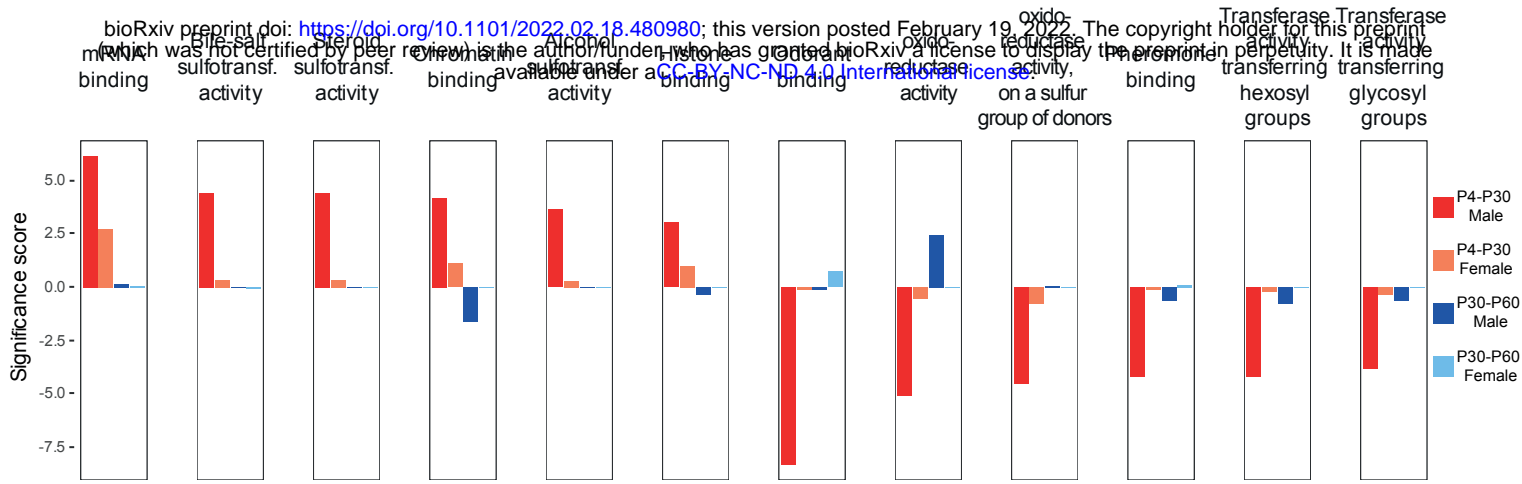

**B**

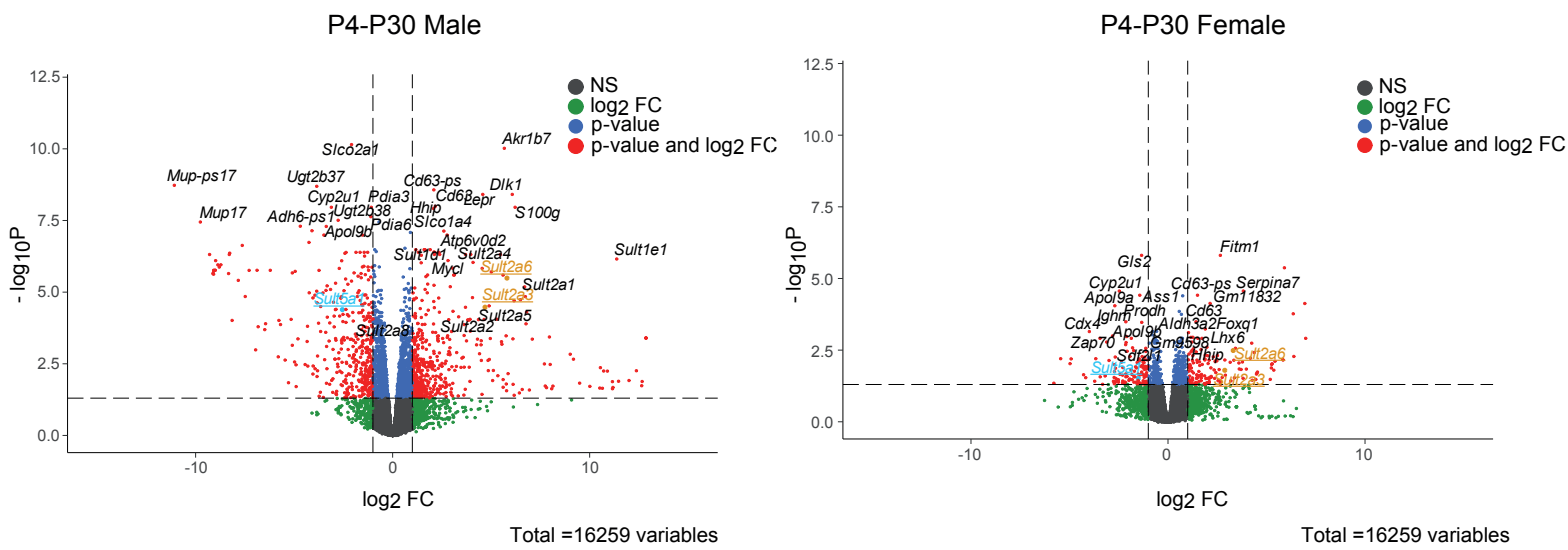

**C**

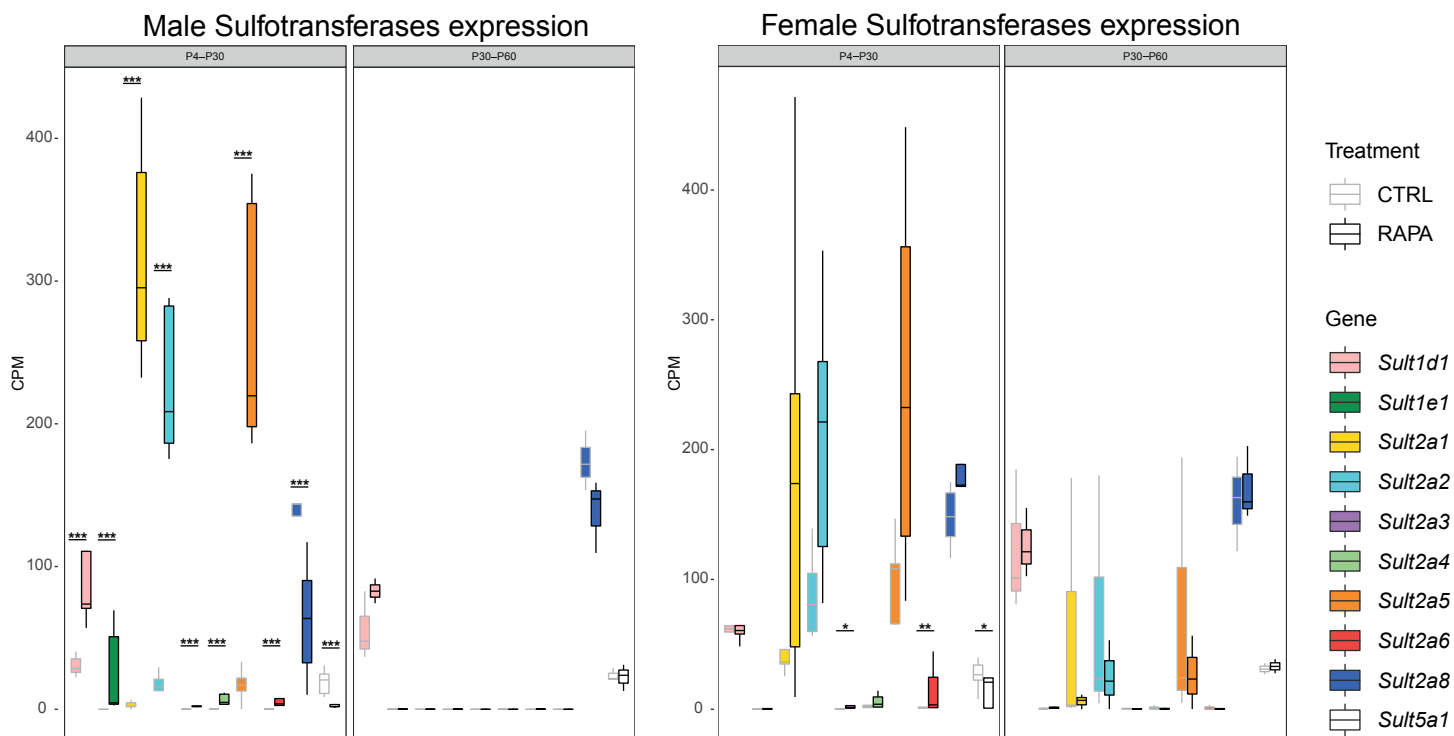

Figure 4

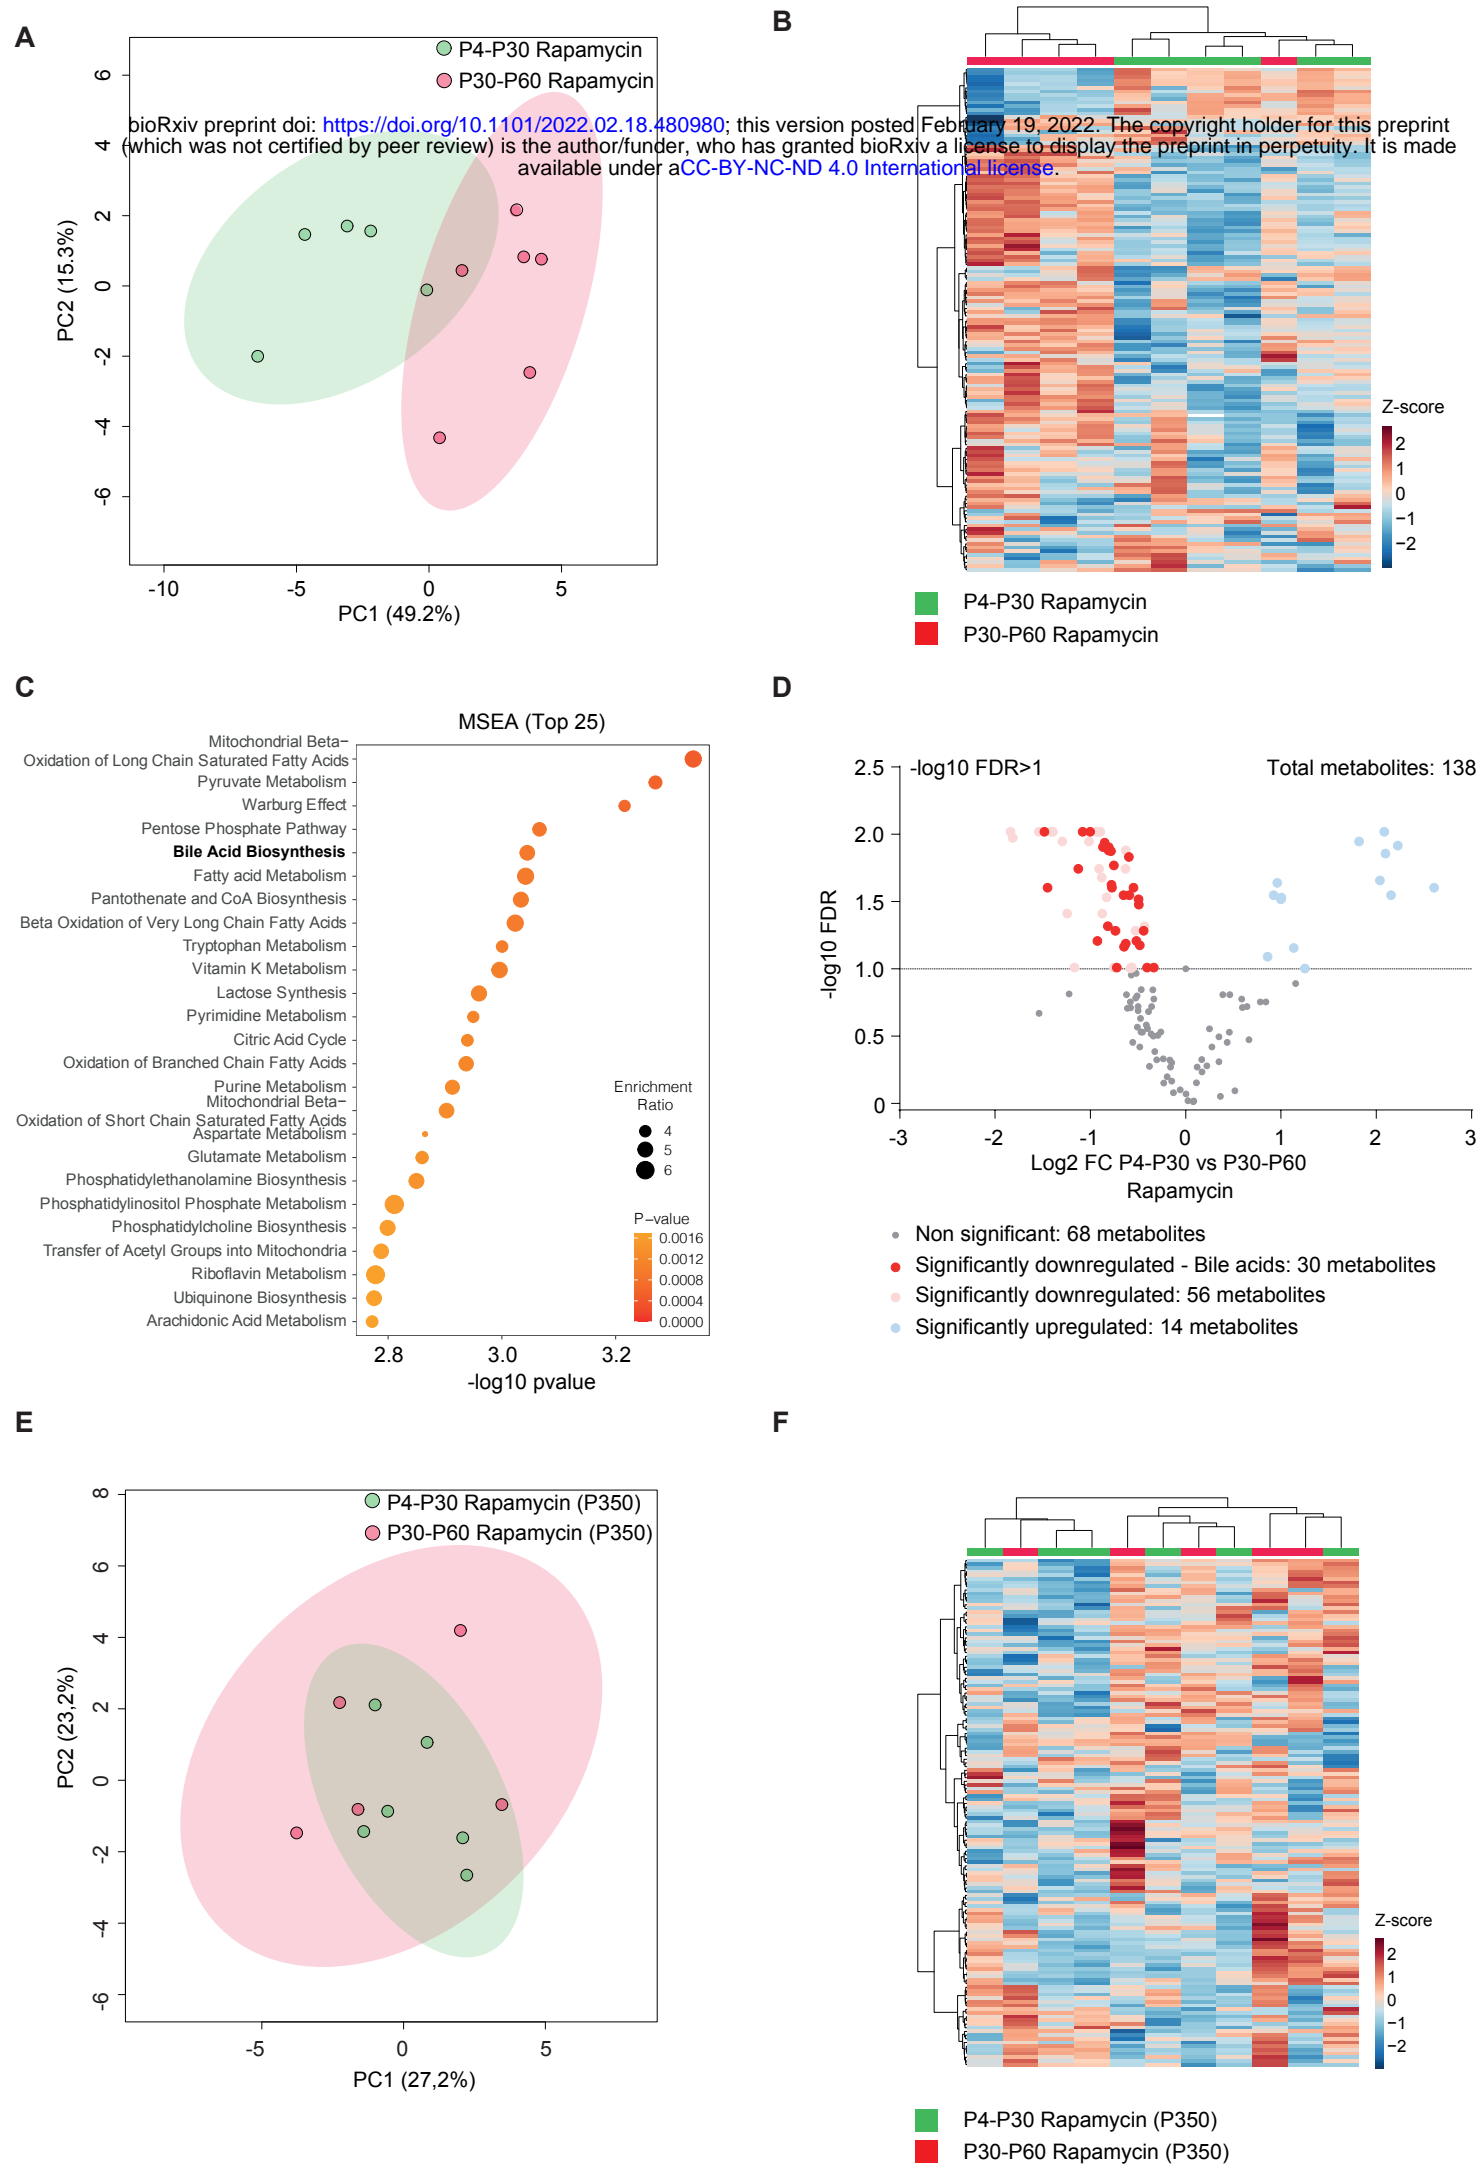

Figure 5

A

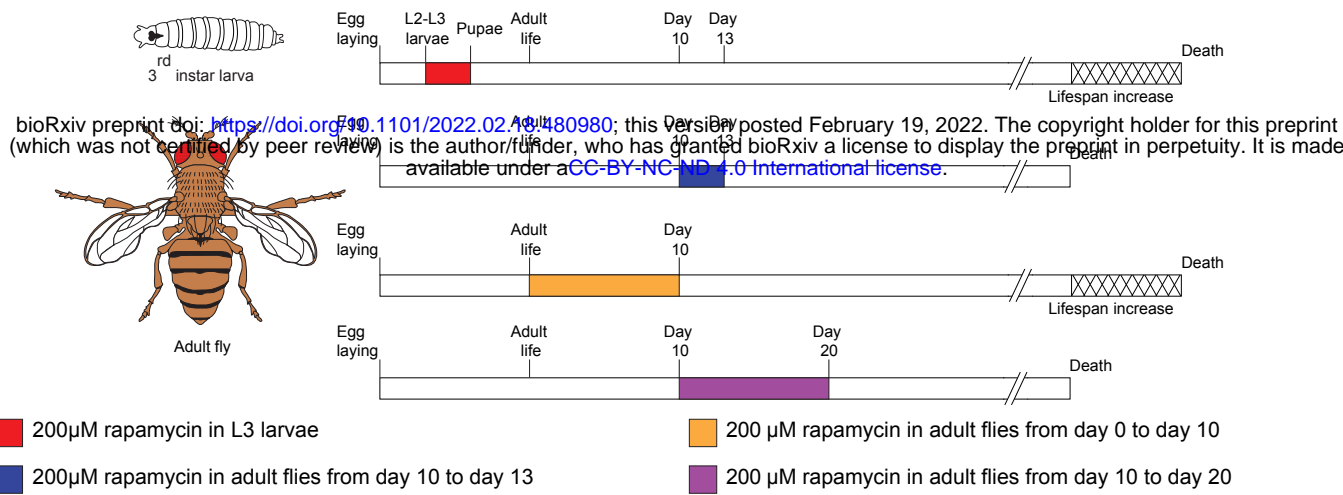

B

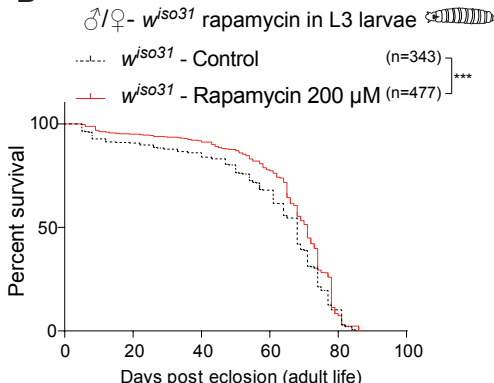

C

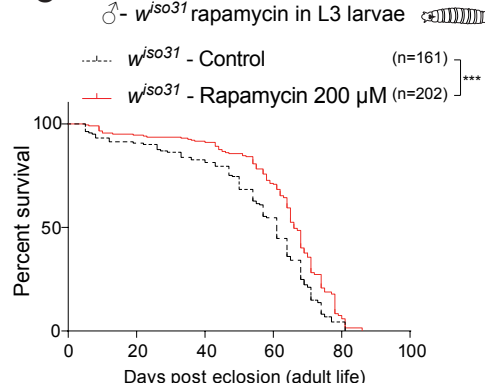

D

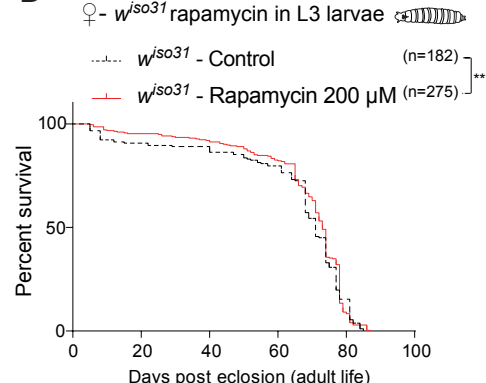

E

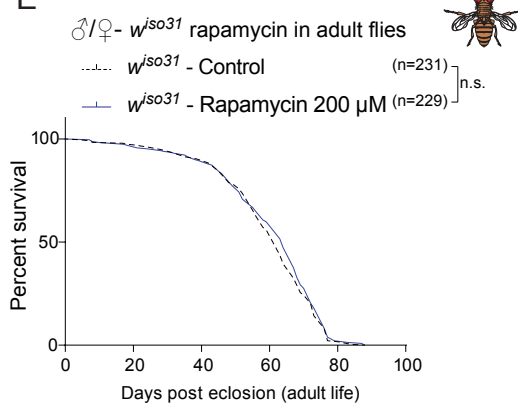

F

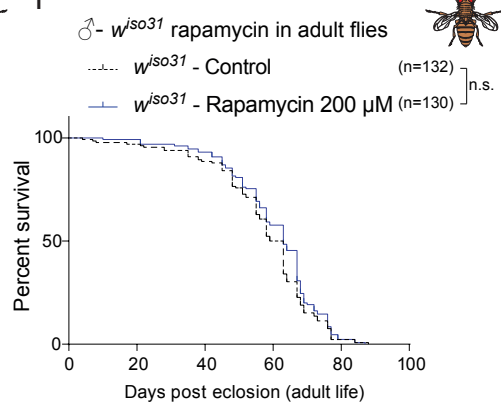

G

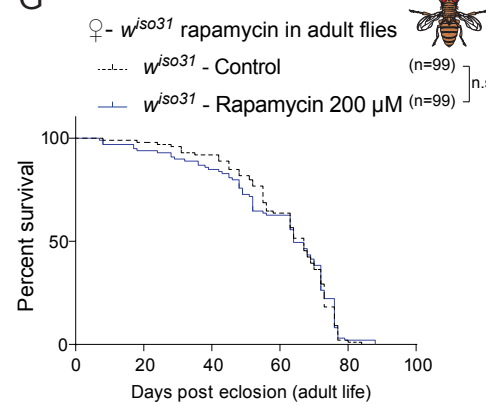

H

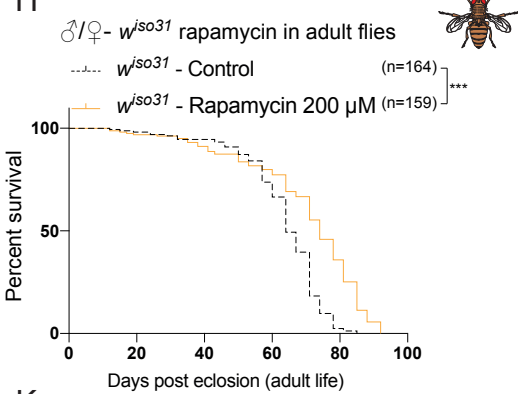

I

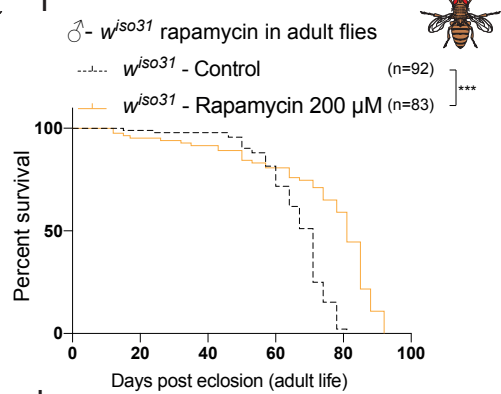

J

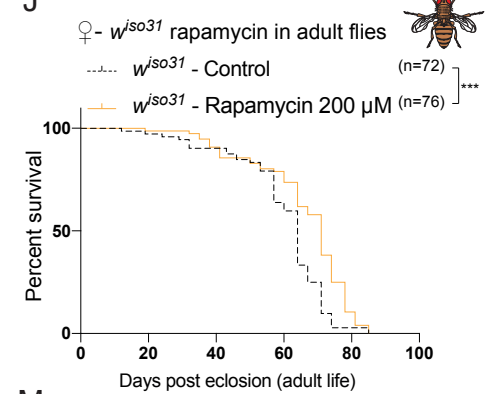

K

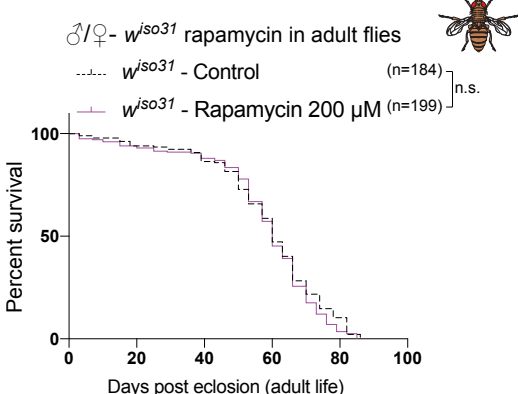

L

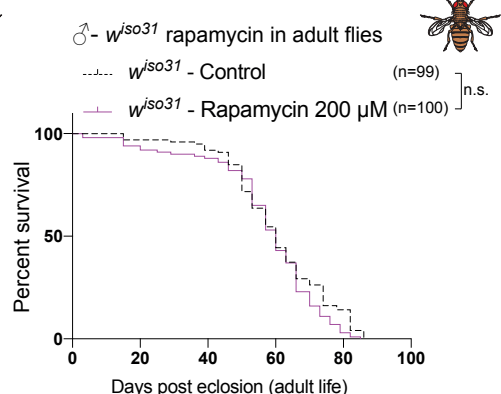

M

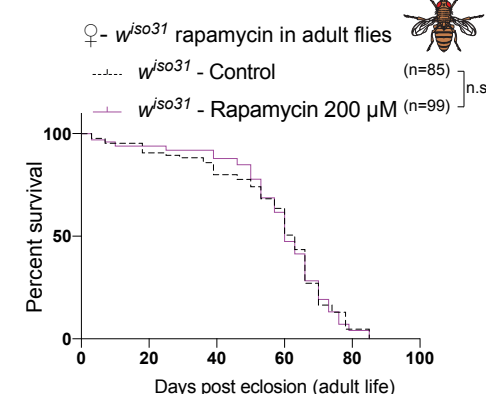

Figure 6



A

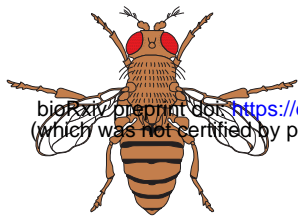

Adult fly

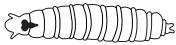3<sup>rd</sup> instar larva

bioRxiv preprint doi: <https://doi.org/10.1101/2022.02.18.480980>; this version posted February 19, 2022. The copyright holder for this preprint (which was not certified by peer review) is the author/funder, who has granted bioRxiv a license to display the preprint in perpetuity. It is made available under a [CC-BY-NC-ND 4.0 International license](https://creativecommons.org/licenses/by-nc-nd/4.0/).

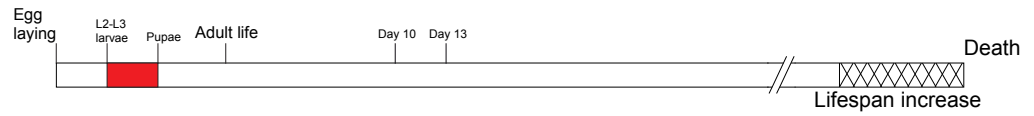

■ ST1 constitutive upregulation during all life of flies

■ ST1 upregulation in L3 Larvae

B

♂/♀- ST1 upregulation

— *TubGal4;UAS-GFP* (n=248)

— *TubGal4;UAS-ST1* (n=200)

\*\*\*

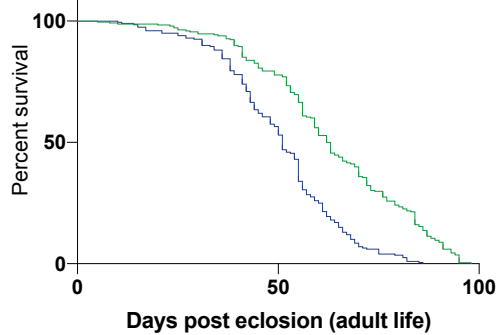

C

♂- ST1 upregulation

— *TubGal4;UAS-GFP* (n=121)

— *TubGal4;UAS-ST1* (n=105)

\*\*\*

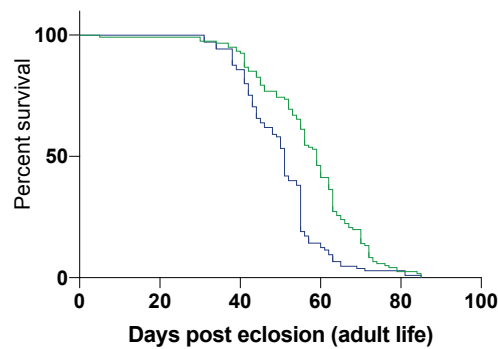

D

♀- ST1 upregulation

— *TubGal4;UAS-GFP* (n=129)

— *TubGal4;UAS-ST1* (n=96)

\*\*\*

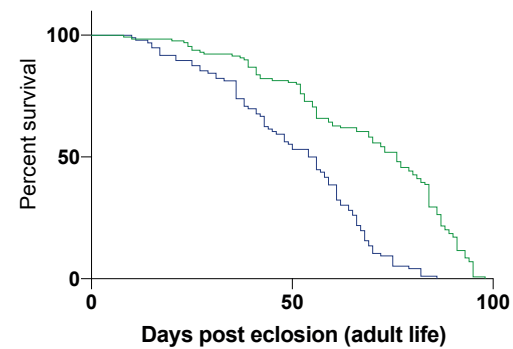

E

♂/♀- ST1 upregulation in L3 larvae

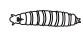

— *TubGal80;TubGal4;UAS-GFP* (n=196)

— *TubGal80;TubGal4;UAS-ST1* (n=195)

\*\*\*

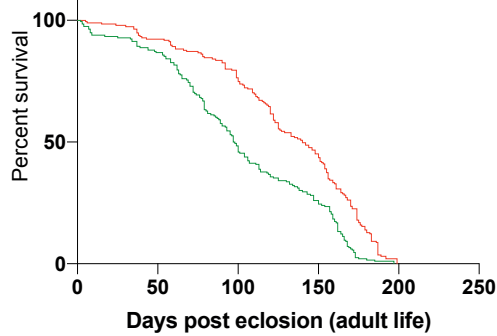

F

♂- ST1 upregulation in L3 larvae

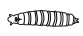

— *TubGal80;TubGal4;UAS-GFP* (n=109)

— *TubGal80;TubGal4;UAS-ST1* (n=108)

\*\*\*

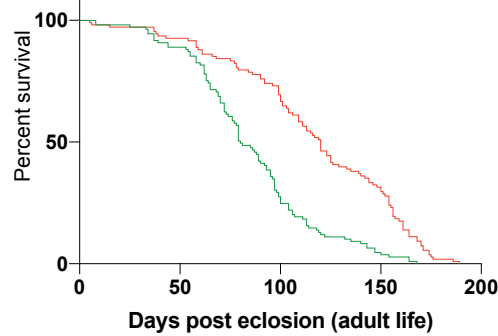

G

♀- ST1 upregulation in L3 larvae

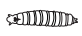

— *TubGal80;TubGal4;UAS-GFP* (n=88)

— *TubGal80;TubGal4;UAS-ST1* (n=87)

\*\*\*

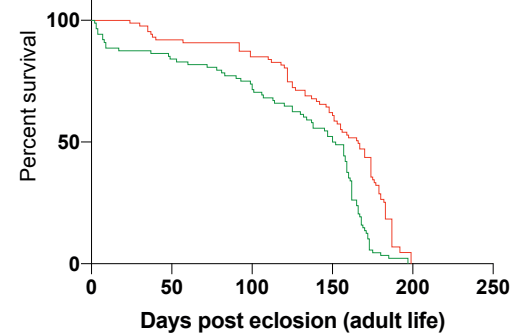

H

♂/♀- ST1 upregulation in L3 larvae

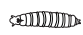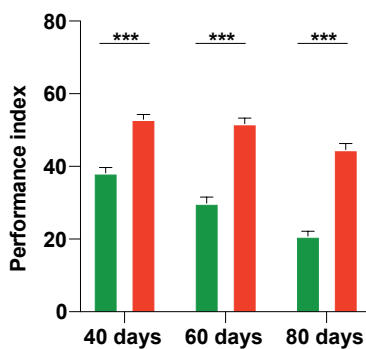

I

♂- ST1 upregulation in L3 larvae

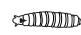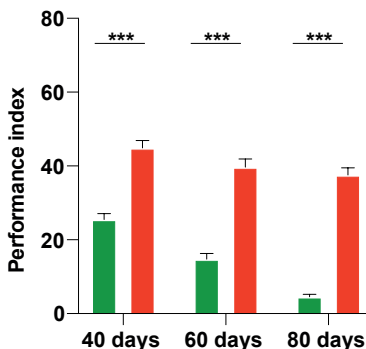

J

♀- ST1 upregulation in L3 larvae

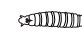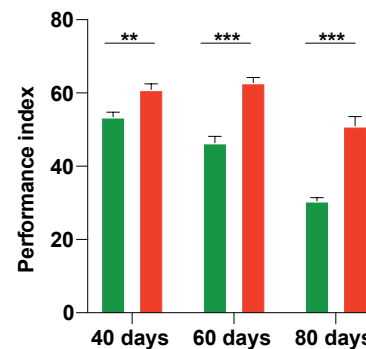

■ *TubGal80;TubGal4;UAS-GFP*

■ *TubGal80;TubGal4;UAS-ST1*

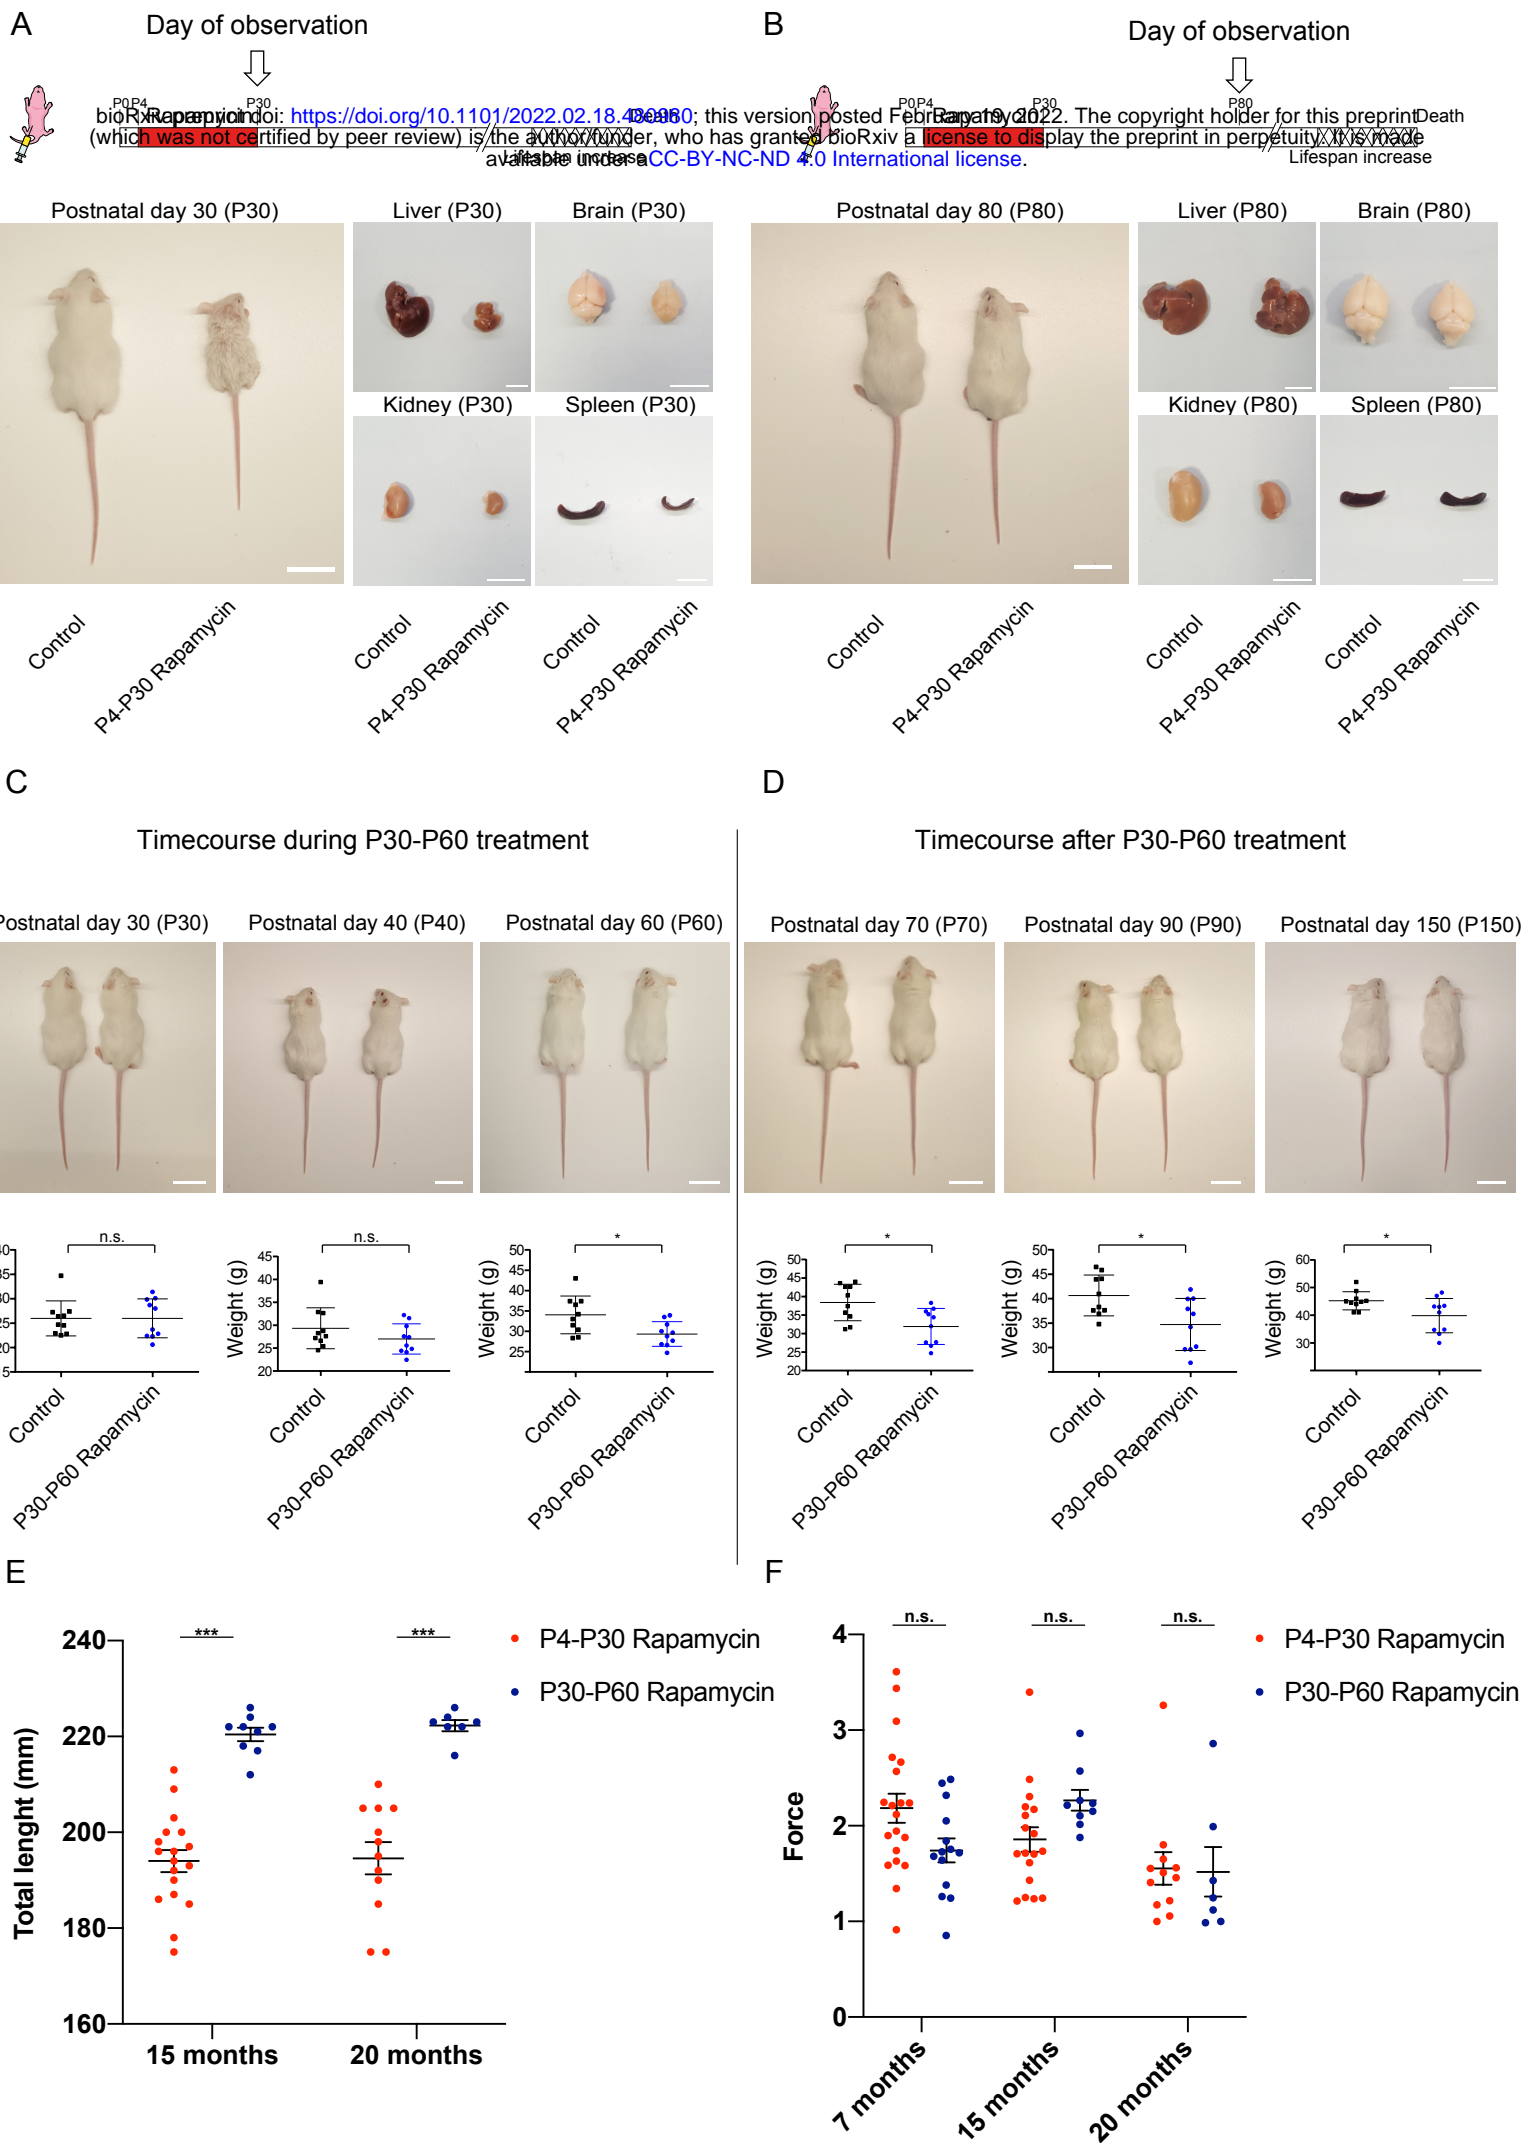

Figure S1

**A**

bioRxiv preprint doi: <https://doi.org/10.1101/2022.02.18.480980>; this version posted February 19, 2022. The copyright holder for this preprint (which was not certified by peer review) is the author/funder, who has granted bioRxiv a license to display the preprint in perpetuity. It is made available under a [CC-BY-NC-ND 4.0 International license](#).

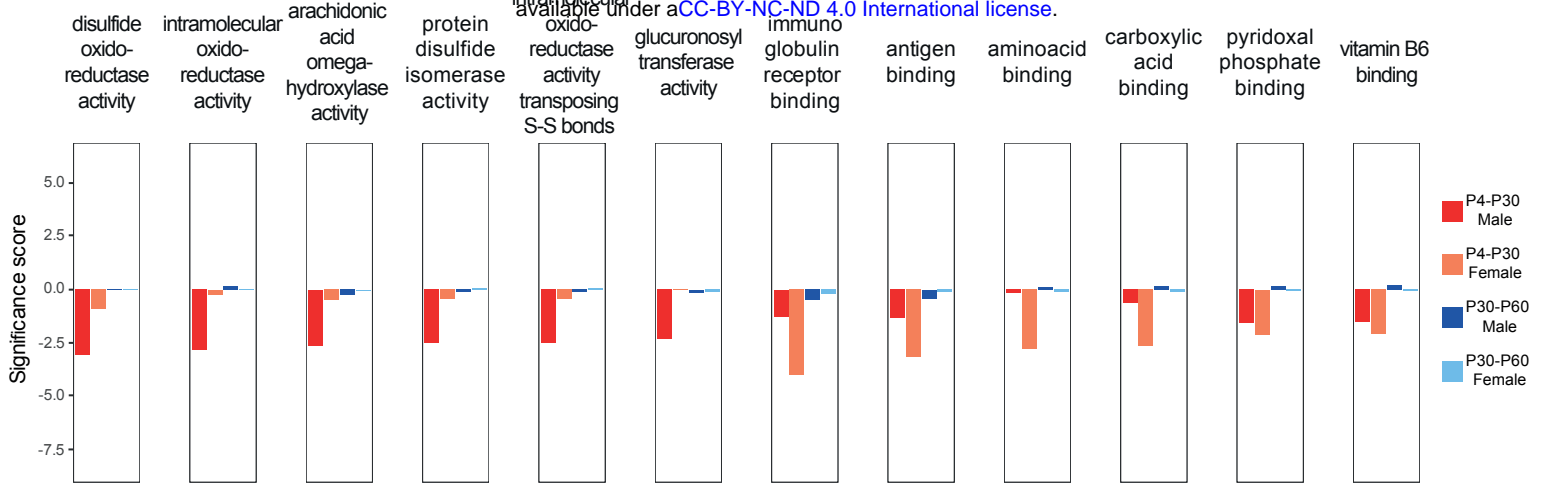

**B**

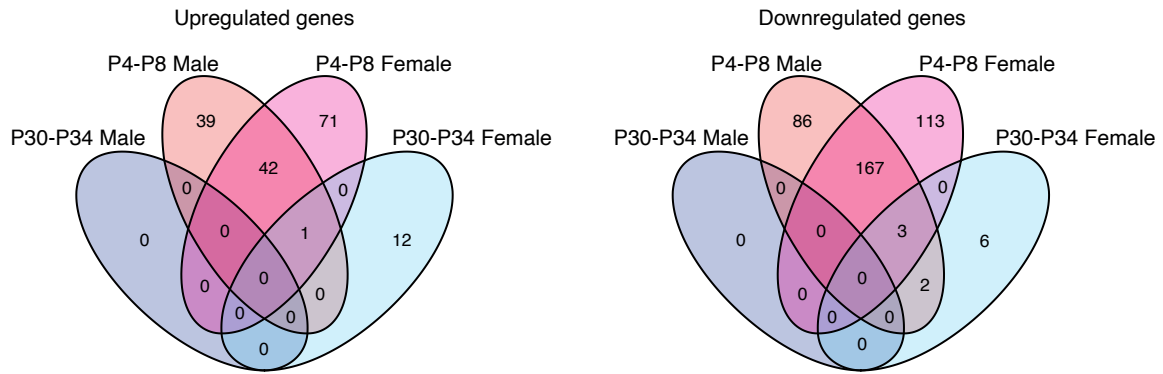

**C**

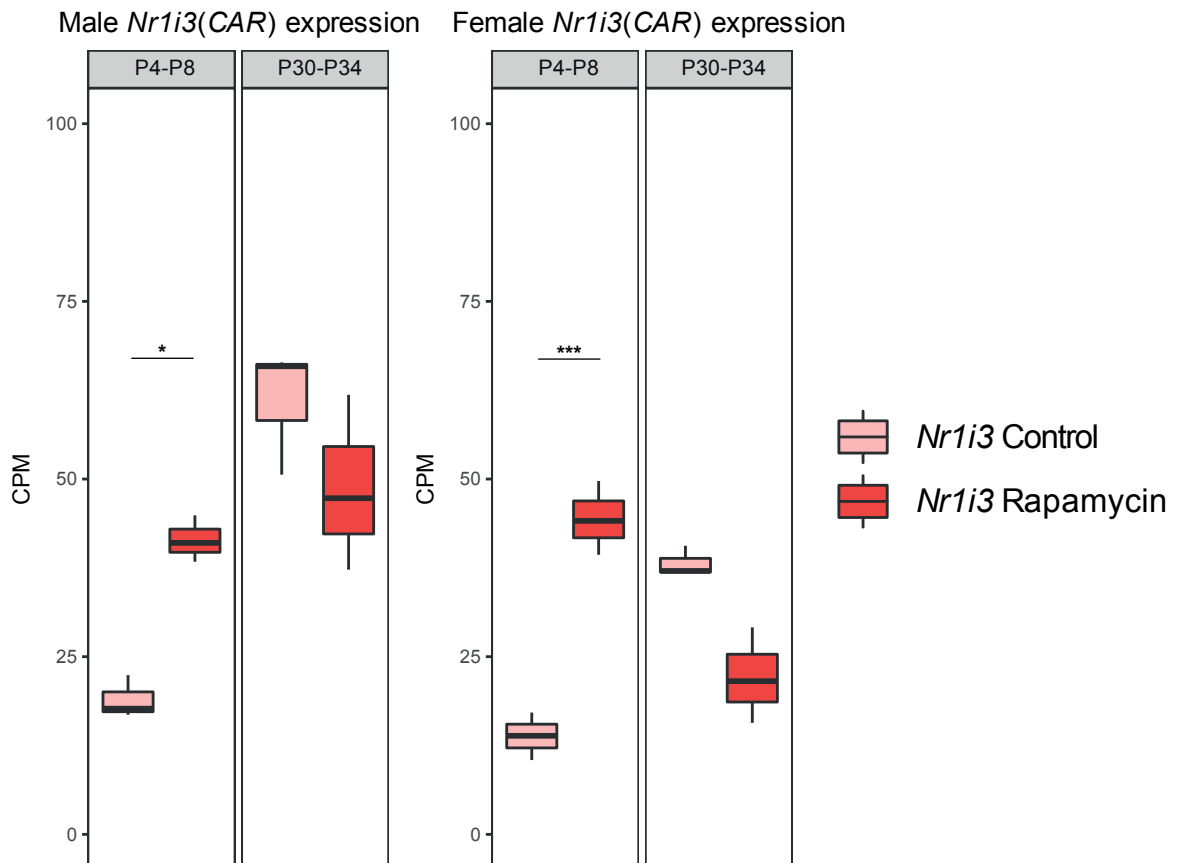

Figure S2

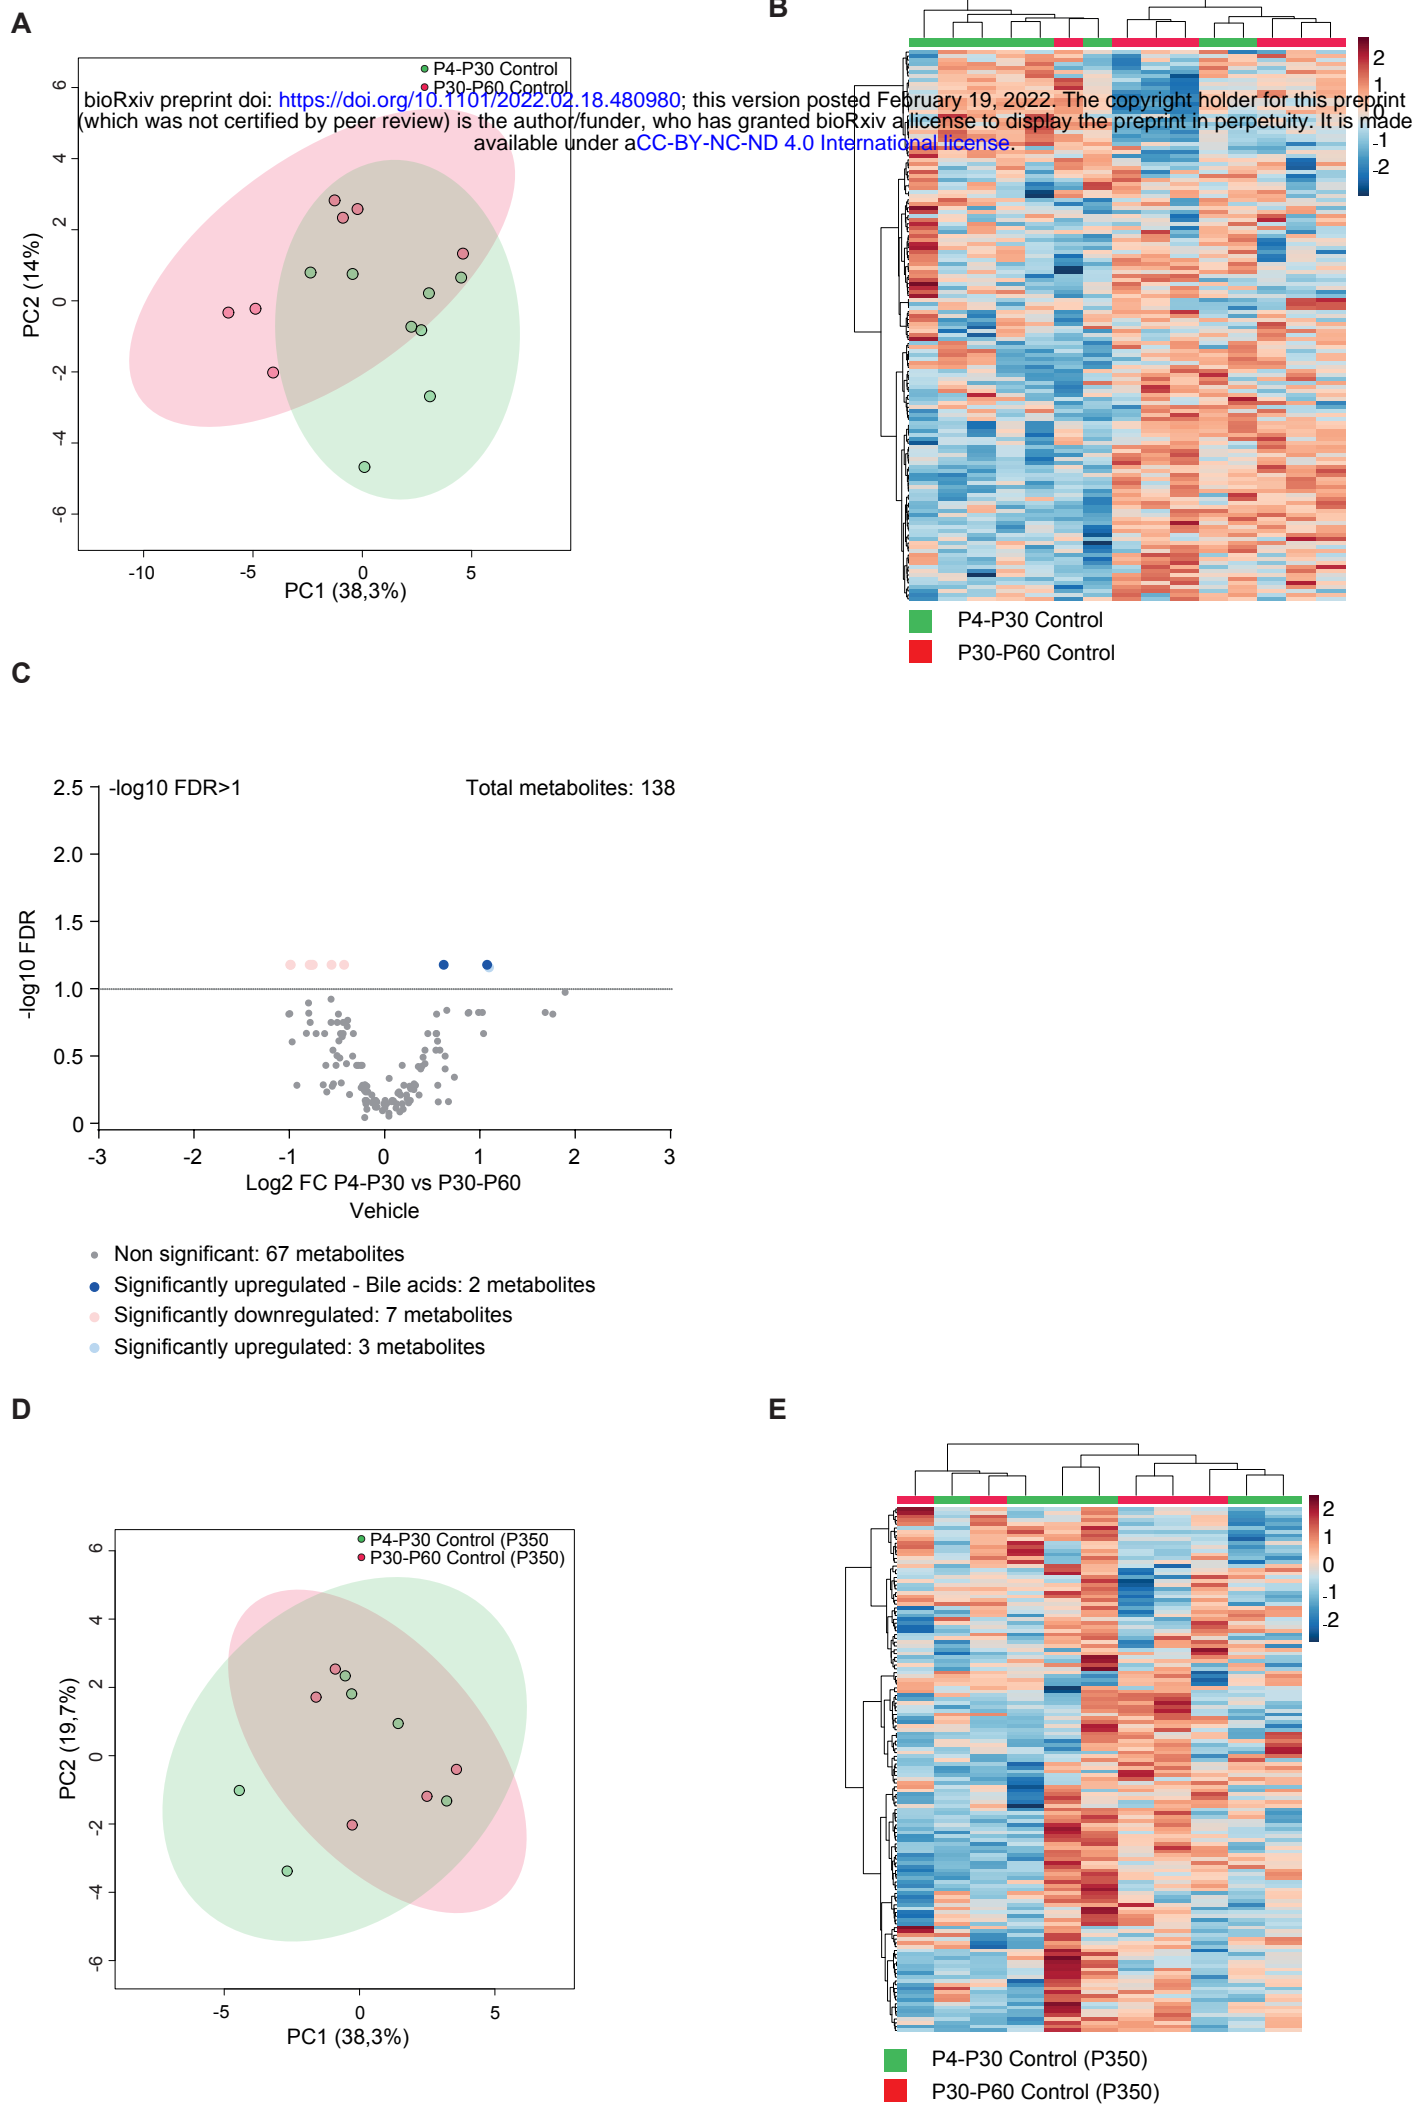

Figure S3

A

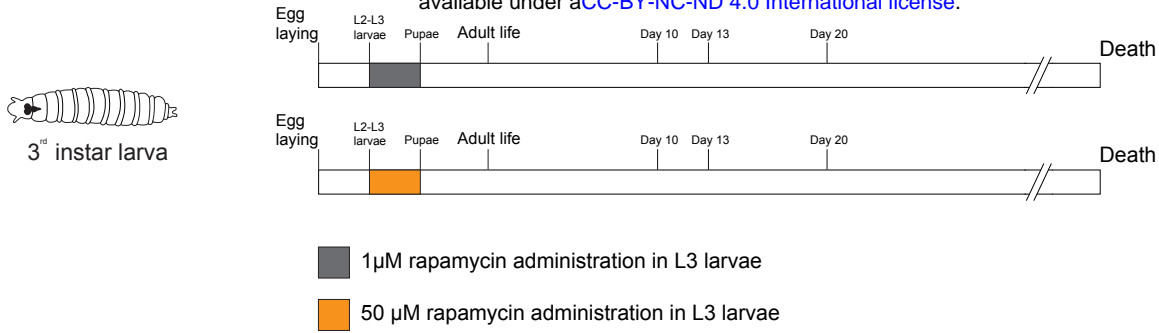

B

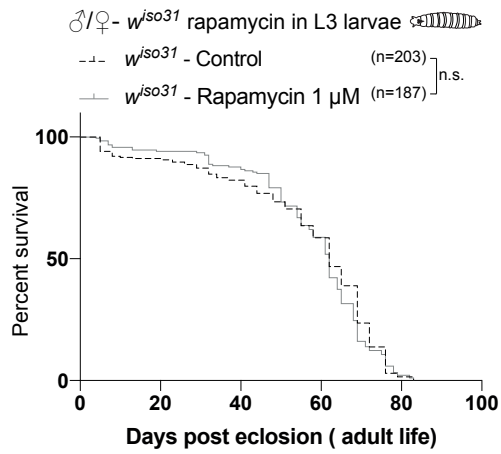

C

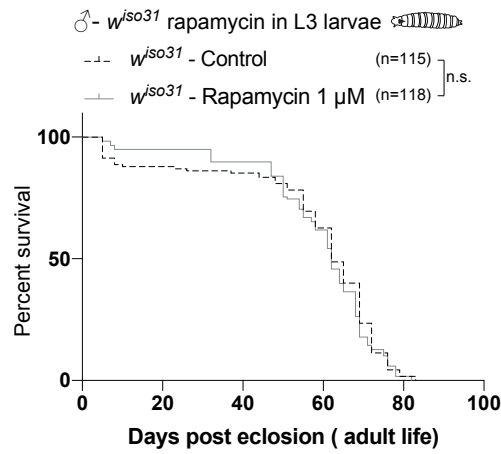

D

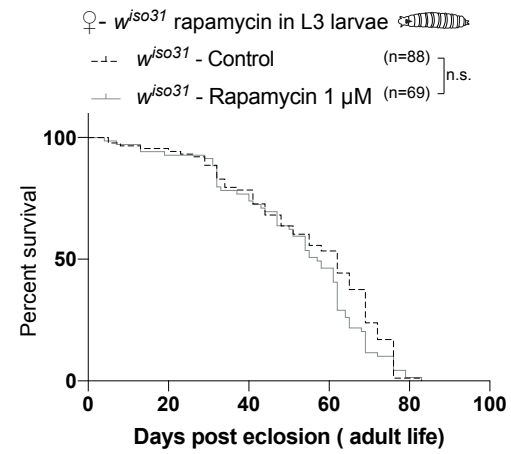

E

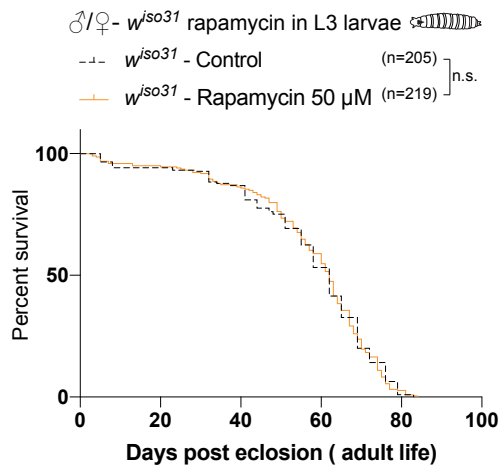

F

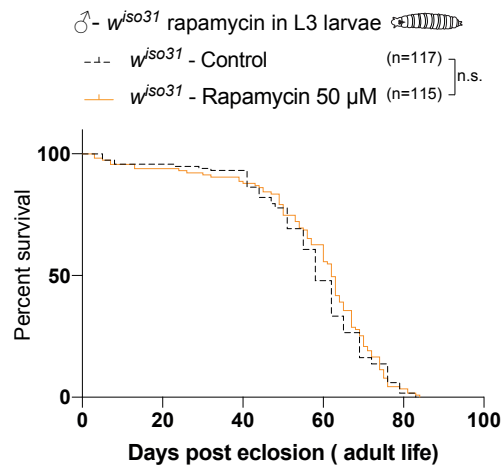

G

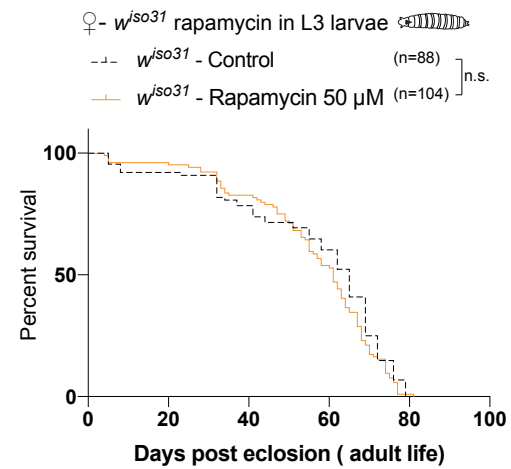

A

bioRxiv preprint doi: <https://doi.org/10.1101/2022.02.18.480980>; this version posted February 19, 2022. The copyright holder for this preprint (which was not certified by peer review) is the author/funder, who has granted bioRxiv a license to display the preprint in perpetuity. It is made available under aCC-BY-NC-ND 4.0 International license.

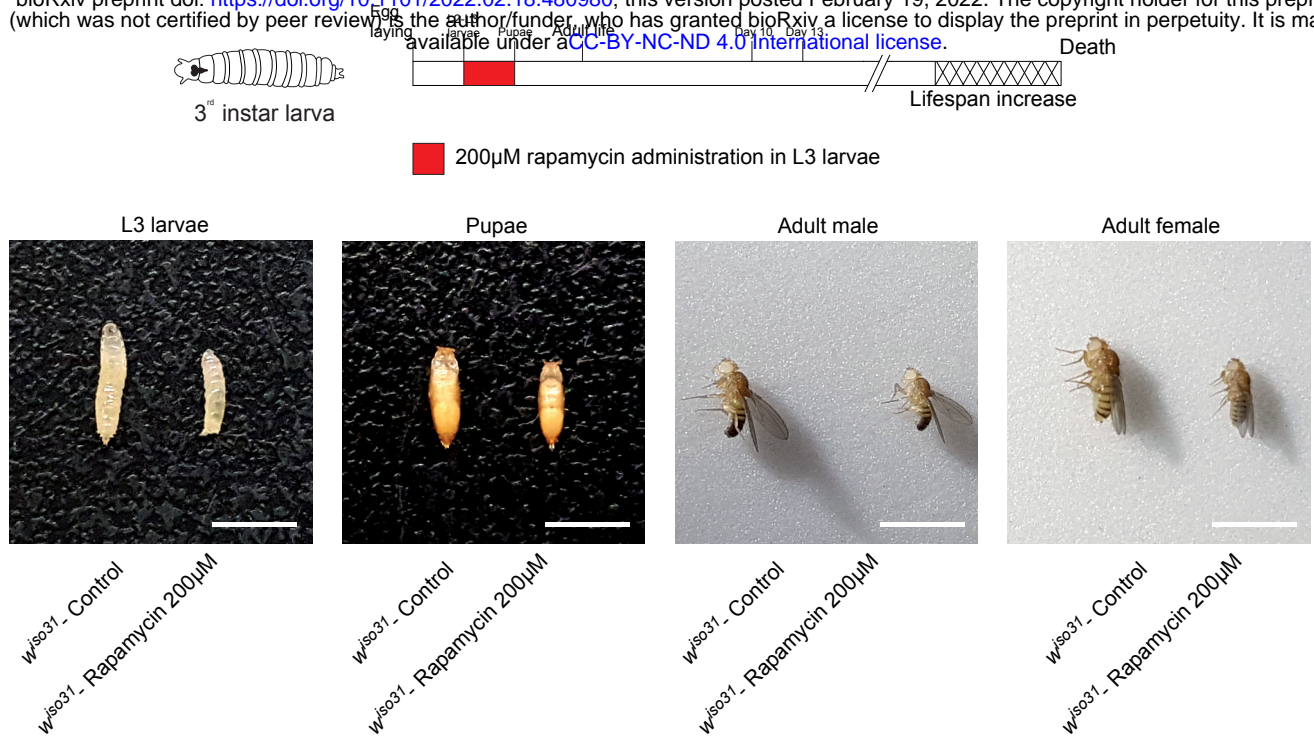

B

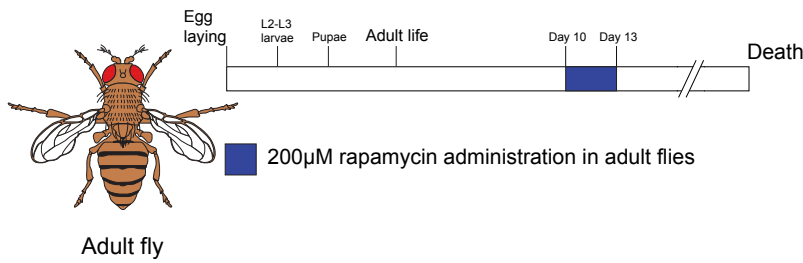

C

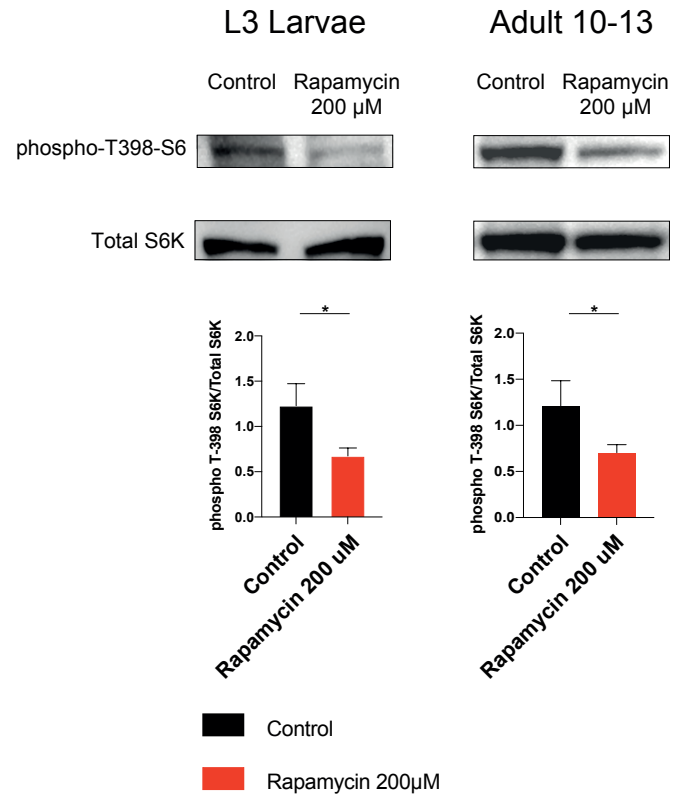



A

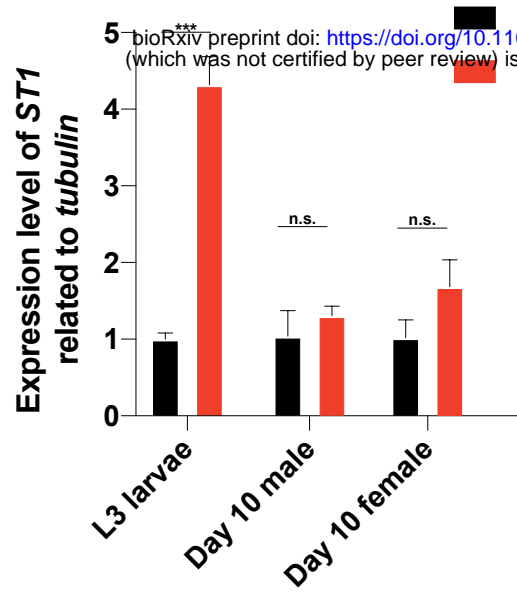

B

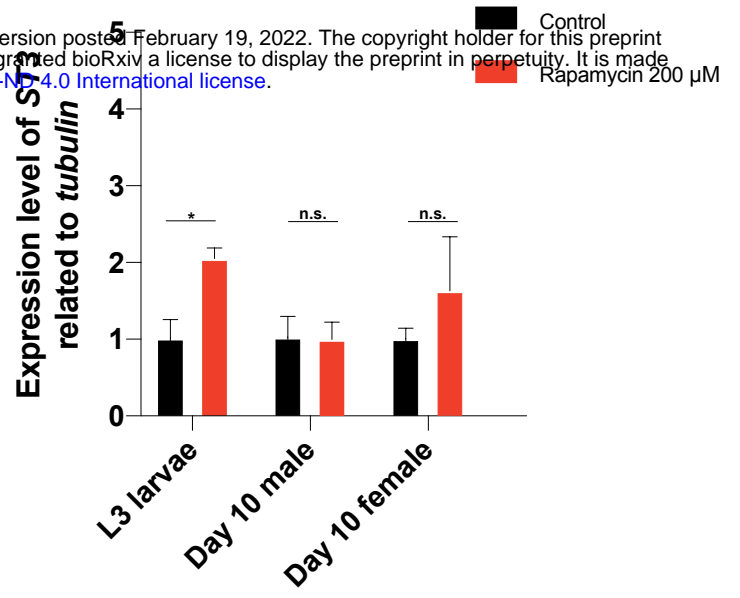

Source: https://www.biorxiv.org/content/10.1101/2022.02.18.480980v1.full.pdf
